# Supplementary material for: Trachoma prevention practice and associated factors among mothers having children aged under nine years in Andabet district, northwest Ethiopia, 2022: A multi-level analysis
Source: PubMed Central journal article supplement (PMC10313038; doi:10.1371/journal.pntd.0011433), 2023-06-30

# PLOS Neglected Tropical Diseases

## Trachoma prevention practice and associated factors among mothers having children aged under nine years in Andabet district, northwest Ethiopia, 2022: A multi-level analysis --Manuscript Draft--

|                                                                                         |                                                                                                                                                                                                                                                                                                                                                                                                                                                                                                                                                                                                                                                                                                                                                                                                                                                                                                                                                                                                                                                                                                                                                                                                                                                                                                                                                                                                                                                                                                                                                                                                                                                                                                                                                                                                                                                                                                                                                                                                                                                                                                                                                                                                                  |
|-----------------------------------------------------------------------------------------|------------------------------------------------------------------------------------------------------------------------------------------------------------------------------------------------------------------------------------------------------------------------------------------------------------------------------------------------------------------------------------------------------------------------------------------------------------------------------------------------------------------------------------------------------------------------------------------------------------------------------------------------------------------------------------------------------------------------------------------------------------------------------------------------------------------------------------------------------------------------------------------------------------------------------------------------------------------------------------------------------------------------------------------------------------------------------------------------------------------------------------------------------------------------------------------------------------------------------------------------------------------------------------------------------------------------------------------------------------------------------------------------------------------------------------------------------------------------------------------------------------------------------------------------------------------------------------------------------------------------------------------------------------------------------------------------------------------------------------------------------------------------------------------------------------------------------------------------------------------------------------------------------------------------------------------------------------------------------------------------------------------------------------------------------------------------------------------------------------------------------------------------------------------------------------------------------------------|
| <b>Manuscript Number:</b>                                                               | PNTD-D-22-01493R1                                                                                                                                                                                                                                                                                                                                                                                                                                                                                                                                                                                                                                                                                                                                                                                                                                                                                                                                                                                                                                                                                                                                                                                                                                                                                                                                                                                                                                                                                                                                                                                                                                                                                                                                                                                                                                                                                                                                                                                                                                                                                                                                                                                                |
| <b>Full Title:</b>                                                                      | Trachoma prevention practice and associated factors among mothers having children aged under nine years in Andabet district, northwest Ethiopia, 2022: A multi-level analysis                                                                                                                                                                                                                                                                                                                                                                                                                                                                                                                                                                                                                                                                                                                                                                                                                                                                                                                                                                                                                                                                                                                                                                                                                                                                                                                                                                                                                                                                                                                                                                                                                                                                                                                                                                                                                                                                                                                                                                                                                                    |
| <b>Short Title:</b>                                                                     | Trachoma prevention practice and associated factors among mothers                                                                                                                                                                                                                                                                                                                                                                                                                                                                                                                                                                                                                                                                                                                                                                                                                                                                                                                                                                                                                                                                                                                                                                                                                                                                                                                                                                                                                                                                                                                                                                                                                                                                                                                                                                                                                                                                                                                                                                                                                                                                                                                                                |
| <b>Article Type:</b>                                                                    | Research Article                                                                                                                                                                                                                                                                                                                                                                                                                                                                                                                                                                                                                                                                                                                                                                                                                                                                                                                                                                                                                                                                                                                                                                                                                                                                                                                                                                                                                                                                                                                                                                                                                                                                                                                                                                                                                                                                                                                                                                                                                                                                                                                                                                                                 |
| <b>Keywords:</b>                                                                        | Key word: Trachoma, Trachoma prevention practice, multi-level analysis, random effect analysis.                                                                                                                                                                                                                                                                                                                                                                                                                                                                                                                                                                                                                                                                                                                                                                                                                                                                                                                                                                                                                                                                                                                                                                                                                                                                                                                                                                                                                                                                                                                                                                                                                                                                                                                                                                                                                                                                                                                                                                                                                                                                                                                  |
| <b>Abstract:</b>                                                                        | <p><b>A b s tract</b></p> <p><b>Background</b><br/>The <b>world health organization</b> adopted the Surgery, Antibiotic, facial <b>cleanness</b>, and environmental improvement (SAFE) strategy for the prevention of trachoma, and different prevention strategies have been employed in Andabet district. Trachoma still has a high prevalence despite these efforts. So, it is imperative to assess ground trachoma prevention practices since there are insufficient studies in the study area.</p> <p><b>Objective</b><br/>To determine the magnitude and factors associated with <b>trachoma prevention practice</b> among mothers having children aged under nine years in Andabet district, Northwest Ethiopia.</p> <p><b>M e thod</b><br/>A community-based cross-sectional study involving 624 participants was conducted <b>from</b> June 1- 30, 2022. Systematic random sampling was carried out to select study participants. Multi-level binary logistic regression analysis was used to identify factors associated with poor <b>TPP</b>. Descriptive and summary statistics were performed and Variables with p-value &lt; 0.05 in the best-fitted model were declared to be significantly associated with poor TPP.</p> <p><b>Results</b><br/>In this study, the proportion of poor TPP was found to be 50.16% (95%CI=46.23, 54.08). In the multi-variable multi-level logistic regression; having no formal education (AOR= 2.95; 95%CI: 1.41,6.15) and primary education (AOR= 2.33; 95%CI:1.04, 5.24), being a farmer (AOR=3.02; 95%CI:1.73,5.28), and merchant (AOR=2.63; 95%CI:1.20, 5.75), time taken to water point &gt;30 minutes (AOR=4.60,95CI:1.30,16.26) and didn't take health education about trachoma (AOR=2.36;95CI:1.16,4.79) were significantly associated with poor <b>TPP</b>.</p> <p><b>Conclusion</b><br/>The proportion of poor trachoma prevention practice was high relative to other studies. Level of education, occupation, time taken to the water source, and health education were significantly associated with poor <b>trachoma prevention practice</b>. Therefore, taking special attention to these high-risk groups could decrease the poor <b>TPP</b>.</p> |
| <b>Additional Information:</b>                                                          |                                                                                                                                                                                                                                                                                                                                                                                                                                                                                                                                                                                                                                                                                                                                                                                                                                                                                                                                                                                                                                                                                                                                                                                                                                                                                                                                                                                                                                                                                                                                                                                                                                                                                                                                                                                                                                                                                                                                                                                                                                                                                                                                                                                                                  |
| <b>Question</b>                                                                         | <b>Response</b>                                                                                                                                                                                                                                                                                                                                                                                                                                                                                                                                                                                                                                                                                                                                                                                                                                                                                                                                                                                                                                                                                                                                                                                                                                                                                                                                                                                                                                                                                                                                                                                                                                                                                                                                                                                                                                                                                                                                                                                                                                                                                                                                                                                                  |
| <b>Government Employee</b>                                                              | No - No authors are employees of the U.S. government.                                                                                                                                                                                                                                                                                                                                                                                                                                                                                                                                                                                                                                                                                                                                                                                                                                                                                                                                                                                                                                                                                                                                                                                                                                                                                                                                                                                                                                                                                                                                                                                                                                                                                                                                                                                                                                                                                                                                                                                                                                                                                                                                                            |
| Are you or any of the contributing authors an employee of the United States government? |                                                                                                                                                                                                                                                                                                                                                                                                                                                                                                                                                                                                                                                                                                                                                                                                                                                                                                                                                                                                                                                                                                                                                                                                                                                                                                                                                                                                                                                                                                                                                                                                                                                                                                                                                                                                                                                                                                                                                                                                                                                                                                                                                                                                                  |

|                                                                                                                                                                                                                                                                                                                                                                                                                                                                                                 |                                                                                                                                                                                                                                           |
|-------------------------------------------------------------------------------------------------------------------------------------------------------------------------------------------------------------------------------------------------------------------------------------------------------------------------------------------------------------------------------------------------------------------------------------------------------------------------------------------------|-------------------------------------------------------------------------------------------------------------------------------------------------------------------------------------------------------------------------------------------|
| <p>Manuscripts authored by one or more US Government employees are not copyrighted, but are licensed under a <a href="#">CC0 Public Domain Dedication</a>, which allows unlimited distribution and reuse of the article for any lawful purpose. This is a legal requirement for US Government employees.</p> <p>This will be typeset if the manuscript is accepted for publication.</p>                                                                                                         |                                                                                                                                                                                                                                           |
| <p><b>Financial Disclosure</b></p> <p>Enter a financial disclosure statement that describes the sources of funding for the work included in this submission and the role the funder(s) played. This includes grants and any commercial funding of the work or authors.</p> <p>This statement will be typeset if the manuscript is accepted for publication.</p> <p>Review the <a href="#">submission guidelines</a> and the instructions link below for detailed requirements and guidance.</p> | <p>The data collection was financially covered by the University of Gondar, Ethiopia. . However, The funder had no role in the study design, data collection, and analysis, decision to publish or the Preparation of the manuscript.</p> |
| <p><b>Competing Interests</b></p> <p>On behalf of all authors, disclose any competing interests that could be perceived to bias this work.</p> <p>This statement will be typeset if the manuscript is accepted for publication.</p> <p>Review the instructions link below and PLOS NTDs' <a href="#">competing interests</a> policy to determine what information must be disclosed at submission.</p>                                                                                          | <p>The authors declare that they have no competing interest</p>                                                                                                                                                                           |
| <p><b>Data Availability</b></p> <p>Provide a <b>Data Availability Statement</b> in the box below. This statement should</p>                                                                                                                                                                                                                                                                                                                                                                     | <p>The datasets used during the current study are available from the corresponding author upon request.</p>                                                                                                                               |

detail where the data used in this submission can be accessed. This statement will be typeset if the manuscript is accepted for publication.

Before publication, authors are required to make all data underlying their findings fully available, without restriction. Review our [PLOS Data Policy](#) page for detailed information on this policy. Instructions for writing your Data Availability statement can be accessed via the Instructions link below.

1 **Trachoma prevention practice and associated factors among**  
2 **mothers having children aged under nine years in Andabet**  
3 **district, northwest Ethiopia, 2022: A multi-level analysis**  
4

5 Zufan Alamrie Asmare <sup>1\*</sup>, Natnael Lakachew Assefa <sup>2</sup>, Dagmawi Abebe<sup>3</sup>, Solomon Gedlu Nigatu  
6 <sup>4</sup>, Yezinash Addis Alimaw <sup>2</sup>

7 <sup>1</sup>Department of Ophthalmology, School of Medicine and Health Science, Debre Tabor University,  
8 Debre Tabor, Ethiopia

9 <sup>2</sup>Department of optometry, School of Medicine and Health Science, University of Gondar, Gondar,  
10 Ethiopia

11 <sup>3</sup>Department of Ophthalmology, School of Medicine and Health Science, University of Gondar,  
12 Gondar, Ethiopia

13 <sup>4</sup> Department of Epidemiology & Biostatistics, School of Medicine and Health Science, University  
14 of Gondar, Gondar, Ethiopia

15

16 **\*corresponding author**

17 Zufan Alamrie Asmare (Debre Tabor University School of Medicine and Health Science)

18 EMAIL: [zufanalamrie2@gmail.com](mailto:zufanalamrie2@gmail.com)

19 PHONE NO; +251937374268,

20 P.O BOX- 272

21

22

## 23 **Abstract**

### 24 **Background**

25 The **world health organization** adopted the Surgery, Antibiotic, facial **cleanness**, and environmental  
26 improvement (SAFE) strategy for the prevention of trachoma, and different prevention strategies  
27 have been employed in Andabet district. Trachoma still has a high prevalence despite these  
28 efforts. So, it is imperative to assess ground **trachoma prevention practices** since there are  
29 insufficient studies in the study area.

### 30 **Objective**

31 To determine the magnitude and factors associated with **trachoma prevention practice** among  
32 mothers having children aged under nine years in Andabet district, Northwest Ethiopia.

### 33 **Method**

34 A community-based cross-sectional study involving 624 participants was conducted **from** June  
35 1- 30, 2022. Systematic random sampling was carried out to select study participants. Multi-  
36 level binary logistic regression analysis was used to identify factors associated with poor TPP.  
37 Descriptive and summary statistics were performed and **V**ariables with p-value < 0.05 in the best-  
38 fitted model were declared to be significantly associated with poor TPP.

### 39 **Results**

40 In this study, the proportion of poor TPP was found to be 50.16% (95%CI=46.23, 54.08). In the  
41 multi-variable multi-level logistic regression; having no formal education (AOR= 2.95; 95%CI:  
42 1.41,6.15) and primary education (AOR= 2.33; 95%CI:1.04, 5.24), being a farmer (AOR=3.02;  
43 95%CI:1.73,5.28), and merchant (AOR=2.63; 95%CI:1.20, 5.75), time taken to water point >30  
44 minutes (AOR=4.60,95CI:1.30,16.26) and didn't take health education about trachoma  
45 (AOR=2.36;95CI:1.16,4.79) were significantly associated with poor TPP.

## 46 **Conclusion**

47 The proportion of poor **trachoma prevention practice** was high relative to other studies. Level of  
48 education, occupation, time taken to the water source, and health education were significantly  
49 associated with poor **trachoma prevention practice**. Therefore, taking special attention to these  
50 high-risk groups could decrease the poor TPP.

51 **Keywords:** Trachoma, Trachoma prevention practice, multi-level analysis, random effect analysis.

## 52 **Author Summary**

53 Trachoma prevention and control strategies have been successful in certain societies, but it has been  
54 more difficult in many communities. In Ethiopia, there are 10.2 million cases of trachoma, in which  
55 the Amhara region takes the lion's share. Half the global population requiring intervention for  
56 trachoma elimination is in the country where some regions/districts have up to 37%TF rate after  
57 years of antibiotic treatment. Facial **cleanliness** & Environmental improvements are critical for  
58 sustained progress toward elimination. This study demonstrates the need to consider support for the  
59 introduction of those interventions (Fand E) for trachoma elimination in Ethiopia and thus the  
60 elimination of an estimated half the global burden. The findings can be used to establish effective  
61 public health approaches and implementation of those strategies (F and E) for trachoma prevention  
62 and control.

## 63 **Introduction**

64 Trachoma is caused by *Chlamydia trachomatis*, a neglected tropical disease (1). It has been one of  
65 the most debilitating diseases affecting 60 to 90 % of children, especially those under nine years  
66 (2, 3). As a devastating disease, Trachoma hinders the performance of children in school and impairs  
67 their ability to lead a healthy and productive life (2). Moreover, these ruinous diseases can result in

68 vision loss, stigma, reduced productivity, and economic loss of US\$ 2.9-5.3 billion annually, and  
69 half of the global burden of trachoma is shared by Ethiopia solely (4, 5).

70 Globally, trachoma causes 1.9 million visual impairments and 1.2 million blindness. It is still  
71 endemic in 44 countries (6, 7). More than 80% of active trachoma is concentrated in Africa,  
72 nearly half is in sub-Saharan Africa (8). In Ethiopia, there are 10.2 million cases of trachoma,  
73 in which the Amhara region takes the lion's share (62.6%) (4, 9).

74 To control the diseases, WHO implemented SAFE (surgery for advanced disease, Antibiotics,  
75 facial cleanliness, and Environmental improvement) (10-13). As a result of the implementation,  
76 trachoma prevalence has drastically decreased (8, 14). As of 5 October 2022, fifteen countries  
77 have been validated as having eliminated the disease as a public health problem (15). Aside  
78 from S (surgery) and A (antibiotics), Proper practice of F (facial cleanliness) and E  
79 (Environmental improvement) is responsible for 58.7% and 37.4% reduction of trachoma  
80 prevalence at all ages and in children respectively (16). Therefore, changes in hygiene behavior  
81 and improvements in environmental infrastructure are ideal long-term strategies for trachoma  
82 control (17).

83 Despite these, in our study area Andabet, Northwest Ethiopia, After 8 to 11 years of implementation  
84 of SAFE, the prevalence of TF (trachomatous follicular) was 37% in 2017. Which is  
85 hyperendemic; other than the other 3 similar settings (9, 18).

86 According to different studies conducted in Ethiopia, the prevalence of poor trachoma prevention  
87 practice was high, which ranges between 45.5 and 64.4%(1, 19). Shreds of evidence have shown  
88 that individual-level factors such as the age of the mother, husband's education, basic knowledge  
89 about trachoma, mother's attitude towards trachoma, taking health education about trachoma, time  
90 taken to the water point and frequency of getting water and also community-level factors such as  
91 residence and types of water source were affected trachoma prevention practice (1, 7, 19-24).

92 Although numerous studies were done on trachoma prevention practice, most of them did not  
93 consider the community-level factors that could affect trachoma prevention practice. Therefore, we  
94 aimed to determine the magnitude and associated factors of trachoma prevention practice.  
95 Identifying various factors at both individual and community levels can have a key role in  
96 implementing policies and programs aimed at minimizing poor trachoma prevention practice.

## 97 **Methods**

### 98 **Study area and period**

99 This study was conducted in the Andabet district, south Gondar zone, Amhara region, Ethiopia  
100 from June 1-30, 2022. The district is located 717 km from Addis Ababa and 150km east of  
101 Bahirdar, the capital city of the Amhara region. Its total population is 152,683 and according to  
102 2022 data from the Andabet district administration office; the district has 26 kebeles with 34765  
103 households. It has 1 primary health care center and 2 health posts. Its climate condition is  
104 Woinadega

### 105 **Study design**

106 A community-based cross-sectional design was used with a systematic random sampling method  
107 from June 1-30, 2022.

### 108 **Source and study population**

109 The source and study population of the study were Mothers having children aged under nine years  
110 who had been living in the Andabet district, Northwest Ethiopia. Mothers who had at least one  
111 child of age less than nine years and those who lived in the district at least for six months were  
112 included in the study.

113 Exclusion criteria



114 Mothers with mental illness, other serious systemic illnesses, and hearing problems were  
115 excluded from the study.

## 116 **Sample size determination**

117 The sample size was calculated using a single population proportion formula for  
118 the proportion of poor **trachoma prevention practice**. By taking a similar study done  
119 in Oromia, Ethiopia with a proportion of **( 48.5%)** (1), 95% confidence level, 5%  
120 margin of error, 1.5 design effect, and 10% non-response rate **the final sample size**  
121 for this study was determined to be 634.

## 122 **Ethical consideration**

123 The study adhered to the tenets of the Declaration of Helsinki and approval was sought and  
124 obtained from the Ethical Review Board of the College of Medicine and Health Sciences,  
125 University of Gondar. A permission letter was obtained from Andabet district administrative office  
126 and written informed consent was obtained from all voluntary participants. The participants were  
127 informed **of** the study would not impose harm on them. There were no personal identifiers and the  
128 confidentiality of the study participants was maintained at all stages of data processing. Informed  
129 verbal consent was obtained from each respondent and **Confidentiality** was kept by using codes  
130 and avoiding personal identifiers.

## 131 **Sampling technique and procedure**

132 A multistage sampling technique was used during the sampling process. Six Kebeles out of 26  
133 Kebeles were selected by using a simple random sampling method after a list of kebeles was  
134 obtained from the Andabet district administration bureau. The total sample size of the study was  
135 allocated proportionally for each Kebele based on the number of mothers having children aged

136 under nine years that were found in each Kebele. Finally, the households were chosen using a  
137 systematic random sample technique.

138 To carry out systematic random sampling, sampling frames were collected from each kebele. The  
139 total estimated number of t h e study population was 4565. Based on t h e study population  
140 and sample size required from each kebele, we calculated the interval between households and found  
141 it to be seven. Then the first household was randomly selected from 1 to 7 serial numbers of  
142 sampling and the remaining households were selected at every 7<sup>th</sup> interval. If mothers in the  
143 household did not fulfill the inclusion criteria and/or **who did** not found with two repeated visits  
144 the next household was taken (Figure 1),

145 **Figure 1:-schematic presentation of sampling technique of trachoma prevention**  
146 **practice among mothers having children aged under nine years in Andabet**  
147 **district, Northwest Ethiopia,2022:a multi-level analysis (n=624)**

148

## 149 **Variables of the study**

### 150 **Dependent variables**

151 The dependent variable was the mother's **trachoma prevention practice**.

### 152 **Independent variables**

153 For this study, the independent variables were classified as individual and community-level  
154 variables. The individual level variables were the Age of the mother, Mother's education, Husband's  
155 education, Occupation of the mother, Religion, Marital status, Number of children under nine years,  
156 age of the youngest child, Sex of the youngest child, Basic trachoma Knowledge, Attitude towards

157 trachoma and Amount of water used per person per day. Community-level variables for this study  
158 were Residence, Type of water source, and Community women's illiteracy level.

## 159 **Operational definition**

160 **Trachoma prevention practice assessment:** is the assessment of the mother's **trachoma prevention**  
161 **practice** towards F and E components of SAFE and is classified as good or poor based on the mean  
162 of the scores (1).

163 **Basic trachoma Knowledge assessment:** is the assessment of the mother's basic  
164 knowledge of trachoma and is classified as good or poor based on the mean of the scores (25)

165 **Attitude towards trachoma assessment:** this is the assessment of the mother's attitude towards  
166 trachoma and is classified as good or poor based on the mean of the scores (25-27).

167 **Facial cleanliness:** measured as an absence of ocular discharge, nasal discharge, and fly (s) on the  
168 eye during the time of examination. If there was one from the list, considered not clean (28).

169 **Ocular discharge:** Any discharge around and/or in the eye at the time of examination (28).

170 **Nasal discharge:** any discharge seen in the nose at the time of examination (28).

171 **Fly-eye:** at least one fly contact with the eyelid margin during eye observation (29).

172 **Time taken to the water source:** collection time does not exceed 30 minutes.

173 **Availability of water:** An average person uses about 20 liters of water per day for

174 **Domestic and personal hygiene** (30).

175 **Utilization of waste disposal pit:** Disposal pits that had at least one of the following: discarded  
176 unwanted agricultural products, domestic products, or ashes (a burned sign of waste) were  
177 considered utilized, otherwise not (31).

178 **Latrine utilization:** Latrines that displayed at least two of the following during the observation:  
179 footpath to the latrine, fresh excreta inside the latrine, presence of a splash of urine, and the absence  
180 of a spider web of the squat were considered utilized, otherwise not (32).

181 **Cleanness of compound:** a household (residential ) compound free from solid waste, liquid  
182 wastes, feces, animal dung, and domestic waste was considered clean (25).

183 **Health education:** Those who received education about trachoma and trachoma prevention at least  
184 once in the past two years were considered to have taken health education (31).

185 **Cleanness of latrine:** if there is at least one of these: human excreta out of the pit, stagnant  
186 urine, and unwanted trash on the floor of the latrine, it was not considered clean (33).

187 **Community-women illiteracy:** it is the aggregated community-level variable derived from  
188 maternal educational level and measured as the proportion of women with no formal education at  
189 the kebele/community level. Based on a median value it was then **dived** into low (mothers from  
190 communities with lower illiteracy levels) and high (mothers from communities with higher  
191 illiteracy levels) categories (34, 35).

## 192 **Data collection procedure and** 193 **quality control**

194 Quantitative data was collected through a face-to-face interview (supported by observation when it  
195 is important) by using an interviewer-administered questionnaire **W**hich was adapted from different  
196 literature and modified to the context. The questionnaire was first developed in English language  
197 and then translated into Amharic (the local language). The questionnaire has six different parts.  
198 Part-I: comprising of socio-demographic questions, Part-II: comprises fifteen different knowledge-  
199 assessing questions, Part-III: comprises seven different attitude-assessing questions, Part-IV:

200 comprises ten questions assessing the trachoma preventive practice, Part-V: comprises  
201 Environmental related questions and part-VI comprises the observation checklist.

202 Pretest was done on 5% of the total sample size at zeboye district in the south Gondar zone. After  
203 the pretest, necessary modifications and corrections took place to ensure validity. Four data  
204 collectors and one supervisor were recruited and trained for 1 day to collect and supervise the data  
205 respectively. The reliability of the question for trachoma prevention practice was checked by  
206 Cronbach alpha and the scale reliability coefficient was 0.795.

## 207 **Data processing and Statistical analysis**

208 Data was entered into Epi-Data version 4.6 then data cleaning, coding, and analysis were done using  
209 STATA version 16. Descriptive statistics were reported using text, tables, and figures. The  
210 proportion of poor trachoma prevention practice with its 95% Confidence interval (CI) was reported.

211 A multilevel logistic regression analysis was used to assess factors associated with trachoma  
212 prevention practice to consider the hierarchical nature of the data in which mothers were nested  
213 within-cluster and mothers within the same cluster are more likely to share similar  
214 characteristics than mothers in another cluster which violates the independent assumptions of  
215 the standard logistic regression model such as the independent and equal variance assumptions.

216 While conducting a multilevel binary logistic regression analysis, we fitted both random effect and  
217 fixed effect analyses. The random effect parameter, intraclass correlation coefficient (ICC)  
218 quantifies the degree of heterogeneity of trachoma prevention practice between clusters and an  
219 ICC of more than 10% indicates that accounting for the cluster-level variability of trachoma  
220 preventive practice using multi-level analysis is appropriate. Moreover, proportion change in  
221 variance (PCV), and median odds ratio (MOR) were assessed.

222 In fixed effect analysis, four models were fitted; model 1 (with the outcome variable only), model  
223 2 (incorporating individual-level variables), model 3 (fitted with community-level variables), and

224 model 4 (incorporating both individual and community-level variables simultaneously). Among the  
225 four models fitted, the last model (model 4) was selected as the best-fitted model since it has the  
226 lowest deviance and highest PCV. For all models fitted, the adjusted odds ratio (AOR) with its 95%  
227 CI was reported. However, the interpretations are based on the final model, the best-fit model.

228 Both bivariable and multivariable multilevel logistic regression was done and variables with p-  
229 value <0.2 in the bivariable analysis were considered multivariable analysis. Finally, variables  
230 with p<0.05 in the multivariable multilevel analysis were declared to be significantly associated  
231 with **trachoma prevention practice**.

## 232 **Result**

### 233 **Socio-demographic characteristics of study participants**

234 A total of 624 study participants were included in the study. With a mean age of 2, the majority  
235 (79.49%) of mothers had children aged less than or equal to two years. **m**ost, 88.78% of mothers  
236 didn't get health education about trachoma while **M**ore than half (57.2%) of them did not receive  
237 any formal education (Table 1).

238 Table 1: socio-demographic characteristics of mothers having children aged under nine years in  
239 Andabet, northwest Ethiopia, 2022: a multi-level analysis (n=624)

| Variables                  | Category        | Frequency | Percentage |
|----------------------------|-----------------|-----------|------------|
| Mother's age<br>(in years) | 15-24           | 88        | 14.10      |
|                            | 25-34           | 312       | 50.00      |
|                            | 35yrs and above | 224       | 35.90      |
| Residence                  | Rural           | 450       | 72.12      |

|                                |                       |     |       |
|--------------------------------|-----------------------|-----|-------|
|                                | Urban                 | 174 | 27.88 |
| Religion                       | Orthodox              | 575 | 92.15 |
|                                | Muslim                | 49  | 7.85  |
| Marital status                 | Married               | 463 | 74.2  |
|                                | Not currently married | 161 | 25.8  |
| Educational level<br>Of mother | No formal education   | 357 | 57.21 |
|                                | primary               | 158 | 25.32 |
|                                | Secondary & above     | 109 | 17.47 |
| Educational level<br>Of father | No formal education   | 233 | 50.32 |
|                                | primary               | 117 | 25.27 |
|                                | Secondary & above     | 113 | 24.41 |
| Occupation of<br>mothers       | farmer                | 297 | 47.60 |
|                                | Housewife             | 174 | 27.88 |
|                                | Government employee   | 37  | 5.93  |
|                                | Merchant              | 79  | 12.66 |
|                                | Daily laborer         | 37  | 5.93  |
| Child age                      | Above 2 yrs.          | 128 | 20.51 |
|                                | 2yrs and under 2yrs   | 496 | 79.49 |
| Sex of the child               | male                  | 321 | 51.44 |

|                          |        |     |       |
|--------------------------|--------|-----|-------|
|                          | female | 303 | 48.56 |
| Taking health            | yes    | 70  | 11.22 |
| Education about trachoma | No     | 554 | 88.78 |
| Community-women          | high   | 243 | 38.94 |
| Illiteracy level         | low    | 381 | 61.06 |

240

241 **Environmental and related**

242 **characteristics**

243 Around three-fourths (73.24%) of mothers got water from the river and 342 (54.81%) of them  
 244 travel more than 30 minutes to get water. Around two third (64.9%) and 354(56.73%) of mothers  
 245 had poor basic trachoma knowledge and attitude towards trachoma. Regarding cleanness of the  
 246 compound, 448 (71.79%) of mothers had unclean house compound (Table 2)

247 Table 2:-Environmental and other related characteristics of mothers having children aged under  
 248 nine years in Andabet district, northwest Ethiopia,2022:a multi-level analysis (n=624)

| Variables                    | Category      | Frequency | Percentage |
|------------------------------|---------------|-----------|------------|
| Source of water              | River         | 457       | 73.24      |
|                              | Household tap | 167       | 26.76      |
| Time taken to<br>Water point | <=30 min      | 282       | 45.19      |
|                              | >30 min       | 342       | 54.81      |
| Amount of water used per     | <=20 liter    | 128       | 20.51      |



|                                   |                     |     |       |
|-----------------------------------|---------------------|-----|-------|
| Person per day                    | >20 liter           | 496 | 79.49 |
| Frequency of<br>Getting water     | All the time        | 516 | 82.69 |
|                                   | Either day or night | 17  | 2.72  |
|                                   | In more than a day  | 91  | 14.59 |
| Source of energy for<br>cooking   |                     |     |       |
| electricity                       | Yes                 | 12  | 1.92  |
|                                   | No                  | 612 | 98.08 |
| wood                              | Yes                 | 615 | 98.56 |
|                                   | No                  | 9   | 1.44  |
| Animal dung                       | Yes                 | 610 | 97.76 |
|                                   | No                  | 14  | 2.24  |
| Charcoal                          | Yes                 | 278 | 44.62 |
|                                   | No                  | 345 | 55.38 |
| Type of household latrine<br>used | Covered pit latrine | 414 | 84.49 |
|                                   | Uncovered latrine   | 76  | 15.51 |
| Cleanness of latrine              | Clean               | 327 | 67.01 |
|                                   | Not clean           | 161 | 32.99 |
| Availability of hand washing      | Yes                 | 15  | 3.07  |

|                                   |           |     |       |
|-----------------------------------|-----------|-----|-------|
| Material near to latrine          | No        | 473 | 96.93 |
| Cleanness of the home compound    | Clean     | 176 | 28.21 |
|                                   | Not clean | 448 | 71.79 |
| Availability of community latrine | Yes       | 153 | 24.52 |
|                                   | No        | 471 | 75.48 |
| Basic trachoma Knowledge          | Good      | 219 | 35.1  |
|                                   | Poor      | 405 | 64.9  |
| Attitude towards Trachoma         | Good      | 354 | 56.73 |
|                                   | Poor      | 270 | 43.27 |

249

## 250 **The magnitude of Trachoma**

### 251 **prevention practice**

252 In this study 49.84 % ( 95%CI: 45.91%, 53.76%) of **trachoma prevention practice** was good and  
 253 50.16 % (95%CI: 46.23%, 54.08%) **trachoma prevention practice** was poor (Figure 2). More than  
 254 two third of mothers had a clean face, 427 (68.43%), and three fourth of children in the study  
 255 had an unclean face, 457 (73.24%). More than three fourth (77.40%) of the mothers use latrines  
 256 (Table 3).

257 Table 3:-Trachoma prevention practice and associated factors among mothers having children aged  
 258 under nine years in Andabet district, northwest Ethiopia,2022:a multi-level analysis (n=624)

| Variables | Category | Frequency | Percentage |
|-----------|----------|-----------|------------|
|-----------|----------|-----------|------------|

|                                     |           |     |       |
|-------------------------------------|-----------|-----|-------|
| Mother facial cleanness             | Clean     | 427 | 68.43 |
|                                     | Not clean | 197 | 31.57 |
| Child facial cleanness              | Clean     | 167 | 26.76 |
|                                     | Not clean | 457 | 73.24 |
| Using soap for face washing         | Yes       | 491 | 78.69 |
|                                     | No        | 133 | 21.31 |
| Did not share fomites With family   | Yes       | 460 | 73.72 |
|                                     | No        | 164 | 26.28 |
| Separated house for Animal dwelling | Yes       | 296 | 47.44 |
|                                     | No        | 328 | 52.56 |
| Availability of household Latrine   | Yes       | 488 | 78.21 |
|                                     | No        | 136 | 21.79 |
| Infant feces disposal To latrine    | Yes       | 482 | 77.24 |
|                                     | No        | 142 | 22.76 |
| Utilization of latrine              | Yes       | 483 | 77.40 |
|                                     | No        | 141 | 22.60 |
| Availability of waste Disposal pit  | Yes       | 289 | 46.39 |
|                                     | No        | 334 | 53.61 |

|                      |     |     |       |
|----------------------|-----|-----|-------|
| Utilization of waste | Yes | 293 | 46.96 |
| Disposal pit         | No  | 331 | 53.04 |

259

260 **Figure 2: Trachoma prevention practice among mothers having children aged**  
 261 **under nine years in Andabet district, Northwest Ethiopia,2022:a multi-level**  
 262 **analysis (n=624)**

263 **Random effect and model comparison**

264 In the random effect analysis, in the null model, about 54% of the total variation in **trachoma**  
 265 **prevention practice** occurred at the cluster level and is attributable to community-level factors. In  
 266 addition, the null model also had the highest MOR value (6.51) indicating when randomly selecting  
 267 a mother from one kebele with a higher risk of poor **trachoma prevention practice** and the other  
 268 kebele at lower risk, mothers at the cluster (kebele) with a higher risk of poor **trachoma prevention**  
 269 **practice** had 6.51 times higher odds of having a poor **trachoma prevention practice** as compared  
 270 with their counterparts. Furthermore, the highest PCV (70.4%) in the final model (model 4) showed  
 271 70.4% of the variation in **trachoma prevention practice** across communities was explained by both  
 272 individual and community-level factors. The model fitness was checked by using deviance and the  
 273 model with the lowest deviance (model4) was the best-fitted model (Table 4).

274 Table 4:-random effect analysis in trachoma prevention practice among mothers having children  
 275 aged under nine years in Andabet, Northwest Ethiopia,2022 (n=624)

| Parameter | Model 1 | Model 2 | Model 3 | Model 4 |
|-----------|---------|---------|---------|---------|
| MOR       | 6.51    | 2.90    | 3.77    | 2.67    |
| PCV       | Reff.   | 0.678   | 0.497   | 0.706   |
| ICC       | 0.54    | 0.27    | 0.37    | 0.25    |
| Deviance  | 583.69  | 536.13  | 576.34  | 531.74  |

276

277 **Factors associated with trachoma prevention**

278 **practice**

279 In the multivariable multi-level logistic regression, maternal education level, maternal occupation,  
280 time taken to the water point, and health education about trachoma were significantly associated  
281 with poor **trachoma prevention practice**.

282 Mothers with no formal education had 2.95(AOR=2.95; 95%CI:1.41,6.15) times higher odds of  
283 poor **trachoma prevention practice** as compared to those mothers with secondary education or  
284 above. Mothers with primary education had 2.33 (AOR= 2.33; 1.04,5.24) times higher odds of  
285 poor **trachoma prevention practice** as compared to those mothers with secondary education or  
286 above. **o**n maternal occupation, **M**others who were farmers had 3.02(AOR=3.02; 95%CI:1.73,  
287 5.28) times higher odds of poor **trachoma prevention practice** as compared to those mothers who  
288 were housewives. Mothers who were merchants had 2.63 (AOR=2.63; 95%CI:1.20, 5.75) times  
289 higher odds of poor **trachoma prevention practice** as compared to those mothers who were  
290 housewives. Regarding time taken to the water point, mothers who traveled >30 minutes to the  
291 water point had 4.60 (AOR= 4.60, 95CI:1.30, 16.26) times higher odds of poor **trachoma**  
292 **prevention practice** as compared to those mothers who traveled ≤30 minutes. Mothers who didn't  
293 take health education about trachoma had 2.36 (AOR= 2.36; 95%CI:1.16, 4.79) times higher odds  
294 of poor **trachoma prevention practice** compared to their counterparts (Table 5).

295 Table 5:-Multilevel logistic regression analysis factors associated with trachoma prevention practice  
296 among mothers having children aged under nine years in Andabet district, Northwest  
297 Ethiopia,2022:a multi-level analysis (n=624)

| variables | Model<br>1 | Mode 2<br>AOR 95%(CI) | Mode 3<br>AOR 95%(CI) | Mode 4<br>AOR 95%(CI) |
|-----------|------------|-----------------------|-----------------------|-----------------------|
|-----------|------------|-----------------------|-----------------------|-----------------------|

|                               |  |                   |  |                        |
|-------------------------------|--|-------------------|--|------------------------|
| Maternal education            |  |                   |  |                        |
| No formal education           |  | 2.97(1.42,6.19)   |  | 2.95(1.41,6.15)**      |
| Primary                       |  | 2.36 (1.05, 5.32) |  | 2.33(1.04,5.24)*       |
| Secondary<br>& above          |  | 1.00              |  | 1.00                   |
| Maternal occupation           |  |                   |  |                        |
| housewife                     |  | 1.00              |  | 1.00                   |
| farmer                        |  | 3.16(1.82,5.50)   |  | 3.02(1.73,5.28)<br>*** |
| Government<br>employee        |  | 1.40(0.45,4.35)   |  | 1.39(0.44,4.37)        |
| Merchant                      |  | 2.64(1.21,5.75)   |  | 2.63(1.20,5.75) *      |
| Daily laborer                 |  | 1.64(0.61,4.41)   |  | 1.61(0.60,4.36)        |
| Frequency of getting<br>water |  |                   |  |                        |
| All the time                  |  | 1.00              |  | 1.00                   |
| Day or night                  |  | 0.45(0.10,2.32)   |  | 0.51(0.10,2.50)        |
| In > a day                    |  | 0.48(0.2,1.13)    |  | 0.50(0.21,1.19)        |
| Time taken to water<br>source |  |                   |  |                        |

|                                    |  |                  |                  |                   |
|------------------------------------|--|------------------|------------------|-------------------|
| ≤30 minute                         |  | 1.00             |                  | 1.00              |
| > 30 minutes                       |  | 5.85(1.70,20.10) |                  | 4.60(1.30,16.26)* |
| Taking education<br>about trachoma |  |                  |                  |                   |
| No                                 |  | 2.25(1.11,4.57)  |                  | 2.36(1.16,4.79)*  |
| Yes                                |  | 1.00             |                  | 1.00              |
| Source of water                    |  |                  |                  |                   |
| River                              |  |                  | 0.45(0.07,3.15)  | 0.54(0.07,4.26)   |
| Household tap                      |  |                  | 1.00             | 1.00              |
| Residence                          |  |                  |                  |                   |
| Rural                              |  |                  | 3.53(0.53,23.54) | 3.16(0.42,23.70)  |
| Urban                              |  |                  | 1.00             | 1.00              |
| Community-women<br>illiteracy      |  |                  |                  |                   |
| Low                                |  |                  | 0.09(0.01,0.87)  | 0.46(0.1,3.55)    |
| High                               |  |                  | 1.00             | 1.00              |

298 Note: \*\*\* =P<0.001, \*\* P<0.01, and \*= P<0.05

299

300 **Discussion**

301 The study aimed to assess the magnitude and associated factors of **trachoma prevention practice** in  
302 the andabet district, Northwest Ethiopia. According to the finding of this study, the magnitude of  
303 poor **trachoma prevention practice** was 50.16%. This finding is in line with a study conducted in  
304 Oromia Ethiopia (1). However, this magnitude of poor **trachoma prevention practice** was found  
305 lower compared to a study conducted in Tigray (25) and higher than a study conducted in north  
306 Vietnam and the Lemo district of **southern Ethiopia** (36, 37). The discrepancy might be due to the  
307 difference in the study population **in which** most of the indicated studies (except the study in  
308 Oromia, Ethiopia, 2021) children under nine years were their study subjects. Besides most of the  
309 above studies were based on **small** sample size. The other possible explanation **is due to** the study  
310 period and **different** in availability and accessibility of maternal health services and facilities.  
311 Moreover, the discrepancy of this finding with that of the findings of studies conducted out of  
312 Ethiopia might be due to socio demographic and cultural differences.

313 The study at hand found that Mothers with no formal education and mothers with primary  
314 education are more likely to have poor prevention practice as compared with those mothers with  
315 secondary or above. This is supported by a study done in Vietnam (38) which similarly showed  
316 that those with no formal education are more likely to have poor prevention practice. This might  
317 be due to the levels and ways of understanding regarding the mechanism of transmission,  
318 prevention measures, and negative effects of the diseases being different among mothers with  
319 different levels of education. That is educated mothers would likely appreciate the problems related  
320 to poor prevention practice more than those with no formal education (36, 39).

321 In this study, health education is another important variable significantly associated with **trachoma**  
322 **prevention practice**. That is mothers who didn't **take** health education about trachoma were more  
323 likely to have poor **trachoma prevention practice** as compared to their counterparts. This finding  
324 is supported by a study conducted in the lemo district (37). Such a correlation could be because  
325 mothers who have not attended health education programs lack the skills needed to prevent



326 trachoma. Hence, they are more likely to have cultural misconceptions about how to use water for  
327 environmental sanitation and personal hygiene (40, 41).

328 **Moreover** in this study mothers who were farmers and merchants were more likely to have poor  
329 **trachoma prevention practice** as compared to those mothers who were housewives. It might be  
330 because based on our study 88% of farmers and 93.6% of merchants did not attend health education  
331 programs on trachoma. **in** addition, most (81.5%) of them have to travel more than 30 minutes to  
332 get water making it more difficult for them to clean their face and improve their environment  
333 than those who are housewives.

334 Consistent with other studies conducted in Kenya and Oromia (1, 42), in this study, time taken to  
335 the water point is significantly associated with **trachoma prevention practice**; those mothers who  
336 traveled more than 30 minutes to the water point had higher odds of poor **trachoma prevention**  
337 **practice** as compared to their counterparts. This might be **due to** access to and adequacy of water  
338 differs between mothers who travel over 30 minutes and those who travel less than 30 minutes  
339 Mothers who have insufficient water may not be able to use it for facial and environmental  
340 cleanliness. Furthermore, based on our study, the majority (81.5%) of mothers traveling over 30  
341 minutes for water get it from unclean streams. while most (74%) of those mothers traveling less  
342 than 30 minutes get it from relatively clean personal and public pipes (42).

## 343 **Strengths and limitations of the study**

344 There were strengths and shortcomings in this study. To begin with the strength, this study  
345 explored **neglected tropical diseases** that became hyper-endemic in our study area after the  
346 implementation of SAFE for about 8 to 11 years. So the result of the study would be important  
347 for employing combined efforts **to** identified modifiable risk factors and will have significant  
348 policy implications in providing support to the affected **community besides**, the study uses multi-  
349 level modeling taking into account the clustering effect to draw valid inference and conclusion.

350 Moreover, to ensure representativeness, the study uses an adequate sample size. However, this  
351 study had limitations as it's a cross-sectional study. It may not show a true temporal relationship  
352 between the outcome and the independent variables. Besides, Due to the lack of sign language-  
353 trained data collectors and the inability to obtain psychiatric therapists as data collectors, it was  
354 not possible to include those mothers with mental illness and hearing problems, although they  
355 were quite insignificant. Moreover, the study mainly relies on the mother's self-report, so there  
356 may be a chance of recall bias. Furthermore, Social desirability bias might be introduced while  
357 assessing sensitive variables

## 358 **Conclusion**

359 In this study, the magnitude of poor trachoma prevention practice was high relative to other studies.  
360 Those mothers with no formal education, with primary education, those who take more time to water  
361 point (>30 minutes), those who didn't take health education about trachoma, and those who were  
362 farmers and merchants were at higher odds of poor trachoma prevention practice. Therefore,  
363 special attention could be taken to these high-risk groups. by doing so this devastating health  
364 problem could be decreased.

## 365 **Recommendations**

366 To governmental and non-governmental organizations: focus on facial cleanness (F) and  
367 Environmental improvement (E) components of SAFE.

368 To Amhara region trachoma control program: planning health education program and enhancing  
369 water supply are recommended to improve trachoma prevention practice overall.

370 To the health office in Andabet district: special attention should be given to those mothers with no  
371 formal education and primary education and who are away from a water source. Besides,  
372 health education programs about trachoma should be strengthened.

373 To the global trachoma community: The low coverage in “Trachoma Prevention Practice” will  
374 affect WHO launched global alliance for the illumination of blinding Trachoma. Therefore, it is  
375 recommended to give special attention to those communities regarding the Facial cleanliness (F)  
376 and Environmental Improvement (E) components of the SAFE strategy.

## 377 **Abbreviations**

378 AOR: adjusted odds ratio; CI: confidence interval; SAFE: Surgery, antibiotics, facial cleanliness,  
379 and environmental improvement; TF: trachomatous follicular; ICC: Intra-class Correlation  
380 Coefficient; MOR: Median Odds Ratio; PCV: Proportionate Change in Variance; PI: Principal  
381 Investigator; TPP: Trachoma prevention practice; WHO: World Health Organization

## 382 **Supporting information**

383 The datasets used during the current study are available from the corresponding author upon  
384 request.

## 385 **Acknowledgments**

386 We are grateful to thank the Department of Optometry, study participants, and data collectors.

## 387 **Funding**

388 The data collection was financially covered by the University of Gondar, Ethiopia. However,  
389 the funder had no role in the study design, data collection, and analysis, decision to publish or the  
390 Preparation of the manuscript.

391

392

## 393 **References**

394 1. Abera T, Tilahun W, Waqjira I. Trachoma prevention practice among mothers with child  
395 age of under-9 years and factors associated in rural district of Oromia Region, Ethiopia:

- 396 Community based cross-sectional study. *World Journal of Advanced Research and Reviews*.  
397 2021;10(1):245-57.
- 398 2. Frick KD, Hanson CL, Jacobson GA. Global burden of trachoma and economics of the  
399 disease. *The American journal of tropical medicine and hygiene*. 2003;69(5\_suppl\_1):1-10.
- 400 3. ETAT. Trachoma - a women and children's health issue. 2020.
- 401 4. Stewart AE, Zerihun M, Gessese D, Melak B, Sata E, Nute AW, et al. Progress to eliminate  
402 trachoma as a public health problem in Amhara National Regional State, Ethiopia: results of 152  
403 population-based surveys. *The American journal of tropical medicine and hygiene*.  
404 2019;101(6):1286.
- 405 5. Bamani S, King JD, Dembele M, Coulibaly F, Sankara D, Kamissoko Y, et al. Where do  
406 we go from here? Prevalence of trachoma three years after stopping mass distribution of antibiotics  
407 in the regions of Kayes and Koulikoro, Mali. *PLoS neglected tropical diseases*. 2010;4(7):e734.
- 408 6. Greenland K, White S, Sommers K, Biran A, Burton MJ, Sarah V, et al. Selecting  
409 behaviour change priorities for trachoma 'F' and 'E' interventions: A formative research study in  
410 Oromia, Ethiopia. 2019;13(10):e0007784.
- 411 7. Golovaty I, Jones L, Gelaye B, Tilahun M, Belete H, Kumie A, et al. Access to water  
412 source, latrine facilities and other risk factors of active trachoma in Ankober, Ethiopia.  
413 2009;4(8):e6702.
- 414 8. Stewart AE, Zerihun M, Gessese D, Melak B, Sata E, Nute AW, et al. Progress to eliminate  
415 trachoma as a public health problem in Amhara National Regional State, Ethiopia: results of 152  
416 population-based surveys. 2019;101(6):1286.
- 417 9. Nash SD, Astale T, Nute AW, Bethea D, Chernet A, Sata E, et al. Population-based  
418 prevalence of *Chlamydia trachomatis* infection and antibodies in four districts with varying levels  
419 of trachoma endemicity in Amhara, Ethiopia. *The American journal of tropical medicine and*  
420 *hygiene*. 2021;104(1):207.
- 421 10. Njomo DW, Karimurio J, Odhiambo GO, Mukuria M, Wanyama EB, Rono HK, et al.  
422 Knowledge, practices and perceptions of trachoma and its control among communities of Narok  
423 County, Kenya. *Tropical diseases, travel medicine and vaccines*. 2016;2(1):1-10.
- 424 11. Aragie S, Wittberg DM, Tadesse W, Dagne A, Hailu D, Chernet A, et al. Water,  
425 sanitation, and hygiene for control of trachoma in Ethiopia (WUHA): a two-arm, parallel-group,  
426 cluster-randomised trial. *The Lancet Global Health*. 2022;10(1):e87-e95.
- 427 12. Organization WH. Water sanitation & hygiene for accelerating and sustaining progress on  
428 neglected tropical diseases: a global strategy 2015-2020. World Health Organization, 2015.
- 429 13. Chikwanda M, Muniyinda N, Mwale C, Mbanefo P, Banda TC, Mubita P. An association  
430 between water, sanitation, and hygiene (WASH) and prevalence of trachoma in Monze district of  
431 Southern Province, Zambia. *Journal of Water, Sanitation and Hygiene for Development*.  
432 2021;11(3):453-60.
- 433 14. Njomo DW, Karimurio J, Odhiambo GO, Mukuria M, Wanyama EB, Rono HK, et al.  
434 Knowledge, practices and perceptions of trachoma and its control among communities of Narok  
435 County, Kenya. 2016;2(1):1-10.
- 436 15. Renneker KK, Abdala M, Addy J, Al-Khatib T, Amer K, Badiane MD, et al. Global  
437 progress toward the elimination of active trachoma: an analysis of 38 countries. *The Lancet Global*  
438 *Health*. 2022;10(4):e491-e500.
- 439 16. Khandekar R, Thanah TTK, Thi PD. Impact of face washing and environmental  
440 improvement on reduction of active trachoma in Vietnam—a public health intervention study.  
441 *Ophthalmic Epidemiology*. 2006;13(1):43-52.
- 442 17. Ejere HO, Alhassan MB, Rabi M. Face washing promotion for preventing active  
443 trachoma. *Cochrane Database of Systematic Reviews*. 2015(2).
- 444 18. Lavett DK, Lansingh VC, Carter MJ, Eckert KA, Silva JC. Will the SAFE strategy be  
445 sufficient to eliminate trachoma by 2020? Puzzlements and possible solutions. *The Scientific*  
446 *World Journal*. 2013;2013.

- 447 19. Gebretnsae H, Mamo N, Teklemariam T, Fenta K, Gebrehiwet T, Berhe A, et al.  
448 Knowledge, attitudes, and practices about trachoma in rural communities of Tigray Region,  
449 Northern Ethiopia: implications for prevention and control. 2020;2020.
- 450 20. Asfaw M, Zolfo M, Negussu N, Tadesse F, Tadele T, Sisay A, et al. Towards the trachoma  
451 elimination target in the Southern region of Ethiopia: How well is the SAFE strategy being  
452 implemented? *The Journal of Infection in Developing Countries*. 2020;14(06.1):3S-9S.
- 453 21. Aiemjoy K, Stoller NE, Gebresillasie S, Shiferaw A, Tadesse Z, Sewnet T, et al. 'If an eye  
454 is washed properly, it means it would see clearly': a mixed methods study of face washing  
455 knowledge, attitudes, and behaviors in rural Ethiopia. 2016;10(10):e0005099.
- 456 22. Lavett DK, Lansingh VC, Carter MJ, Eckert KA, Silva JCJTSWJ. Will the SAFE strategy  
457 be sufficient to eliminate trachoma by 2020? Puzzlements and possible solutions. 2013;2013.
- 458 23. West SK, Nanji AA, Mkocho H, Munoz B, Gaydos C, Quinn TCJPNtd. Evidence for  
459 contamination with *C. trachomatis* in the household environment of children with active Trachoma:  
460 A cross-sectional study in Kongwa, Tanzania. 2019;13(12):e0007834.
- 461 24. MuluneshG M, Mohammed S, Minichil B. trachoma prevention practice and associated  
462 factors in rural lemo district. 2021.
- 463 25. Gebretnsae H, Mamo N, Teklemariam T, Fenta K, Gebrehiwet T, Berhe A, et al.  
464 Knowledge, attitudes, and practices about trachoma in rural communities of Tigray Region,  
465 Northern Ethiopia: implications for prevention and control. *Journal of environmental and public  
466 health*. 2020;2020.
- 467 26. Hassali MA, Shafie AA, Saleem F, Farooqui M, Aljadhey H. A cross sectional assessment  
468 of knowledge, attitude and practice towards Hepatitis B among healthy population of Quetta,  
469 Pakistan. *BMC public health*. 2012;12(1):1-8.
- 470 27. AlRasheed MM, Alsugair AM, Almarzouqi HF, Alonazi GK, Aleanizy FS, Alqahtani FY,  
471 et al. Assessment of knowledge, attitude, and practice of security and safety workers toward the  
472 COVID-19 pandemic: a cross-sectional Study. *Frontiers in public health*. 2021:254.
- 473 28. Stocks ME, Ogden S, Haddad D, Addiss DG, McGuire C, Freeman MC. Effect of water,  
474 sanitation, and hygiene on the prevention of trachoma: a systematic review and meta-analysis.  
475 *PLoS Med*. 2014;11(2):e1001605.
- 476 29. Golovaty I, Jones L, Gelaye B, Tilahun M, Belete H, Kumie A, et al. Access to water  
477 source, latrine facilities and other risk factors of active trachoma in Ankober, Ethiopia. *PLoS One*.  
478 2009;4(8):e6702.
- 479 30. Tadesse B, Worku A, Kumie A, Yimer SA. Effect of water, sanitation and hygiene  
480 interventions on active trachoma in North and South Wollo zones of Amhara Region, Ethiopia: A  
481 Quasi-experimental study. *PLoS neglected tropical diseases*. 2017;11(11):e0006080.
- 482 31. MuluneshG M MS, Minichil B. Trachoma prevention practice and associated factors in rural  
483 lemo district. 2021.
- 484 32. D A. Latrine Utilization and Associated Factors Among Rural Households in Dega Damot  
485 Woreda, West Gojjam Zone, Amhara Region, Ethiopia 2021.
- 486 33. T. MK. National guideline for water, sanitation and hygiene for tanzania school. july, 2016.
- 487 34. Teshale AB, Tesema GA, Tessema ZT. Spatial variations and associated factors of  
488 knowledge of ORS packet or pre-packaged liquids for the management of diarrhea among women  
489 of reproductive age in Ethiopia: A spatial and multilevel analysis. *PloS one*. 2021;16(3):e0247772.
- 490 35. Shah AR, Subramanyam MA. Community-level women's education and undernutrition  
491 among Indian adolescents: A multilevel analysis of a national survey. *PloS one*.  
492 2021;16(5):e0251427.
- 493 36. Khandekar R, Bullard M, Thanh TTK, Binh TQ. Knowledge and practice related to  
494 trachoma among children in Vietnam: A cross-sectional study. *Journal of health communication*.  
495 2004;9(1):77-83.
- 496 37. MuluneshG M MS, Minichil B. Trachoma prevention practice and associated factors in rural  
497 lemo district. 2021.

- 498 38. Khandekar R, Bullard M, Thanh TTK, Binh TQJ. Knowledge and practice related to  
499 trachoma among children in Vietnam: A cross-sectional study. 2004;9(1):77-83.
- 500 39. David K. Water Supply and Sanitation in Vietnam. 2 JMP-UNICEF special tabulation  
501 per wealth quintile, using MICS 2013.
- 502 40. Kuper H, Solomon AW, Buchan J, Zondervan M, Foster A, Mabey D. A critical review of  
503 the SAFE strategy for the prevention of blinding trachoma. *The Lancet Infectious diseases*.  
504 2003;3(6):372-81.
- 505 41. Asaolu SO, Ofoezie IE. The role of health education and sanitation in the control of  
506 helminth infections. *Acta tropica*. 2003;86(2-3):283-94.
- 507 42. PN. M. . Knowledge, Practices and Perceptions of Trachoma and its' Influence  
508 (Association With) on Health Seeking Behaviour of Patients in Kajiado Central Sub County,  
509 Kajiado County, Kenya: COHES, JKUAT; . 2017.

511

512

513

514

515

516

517

518

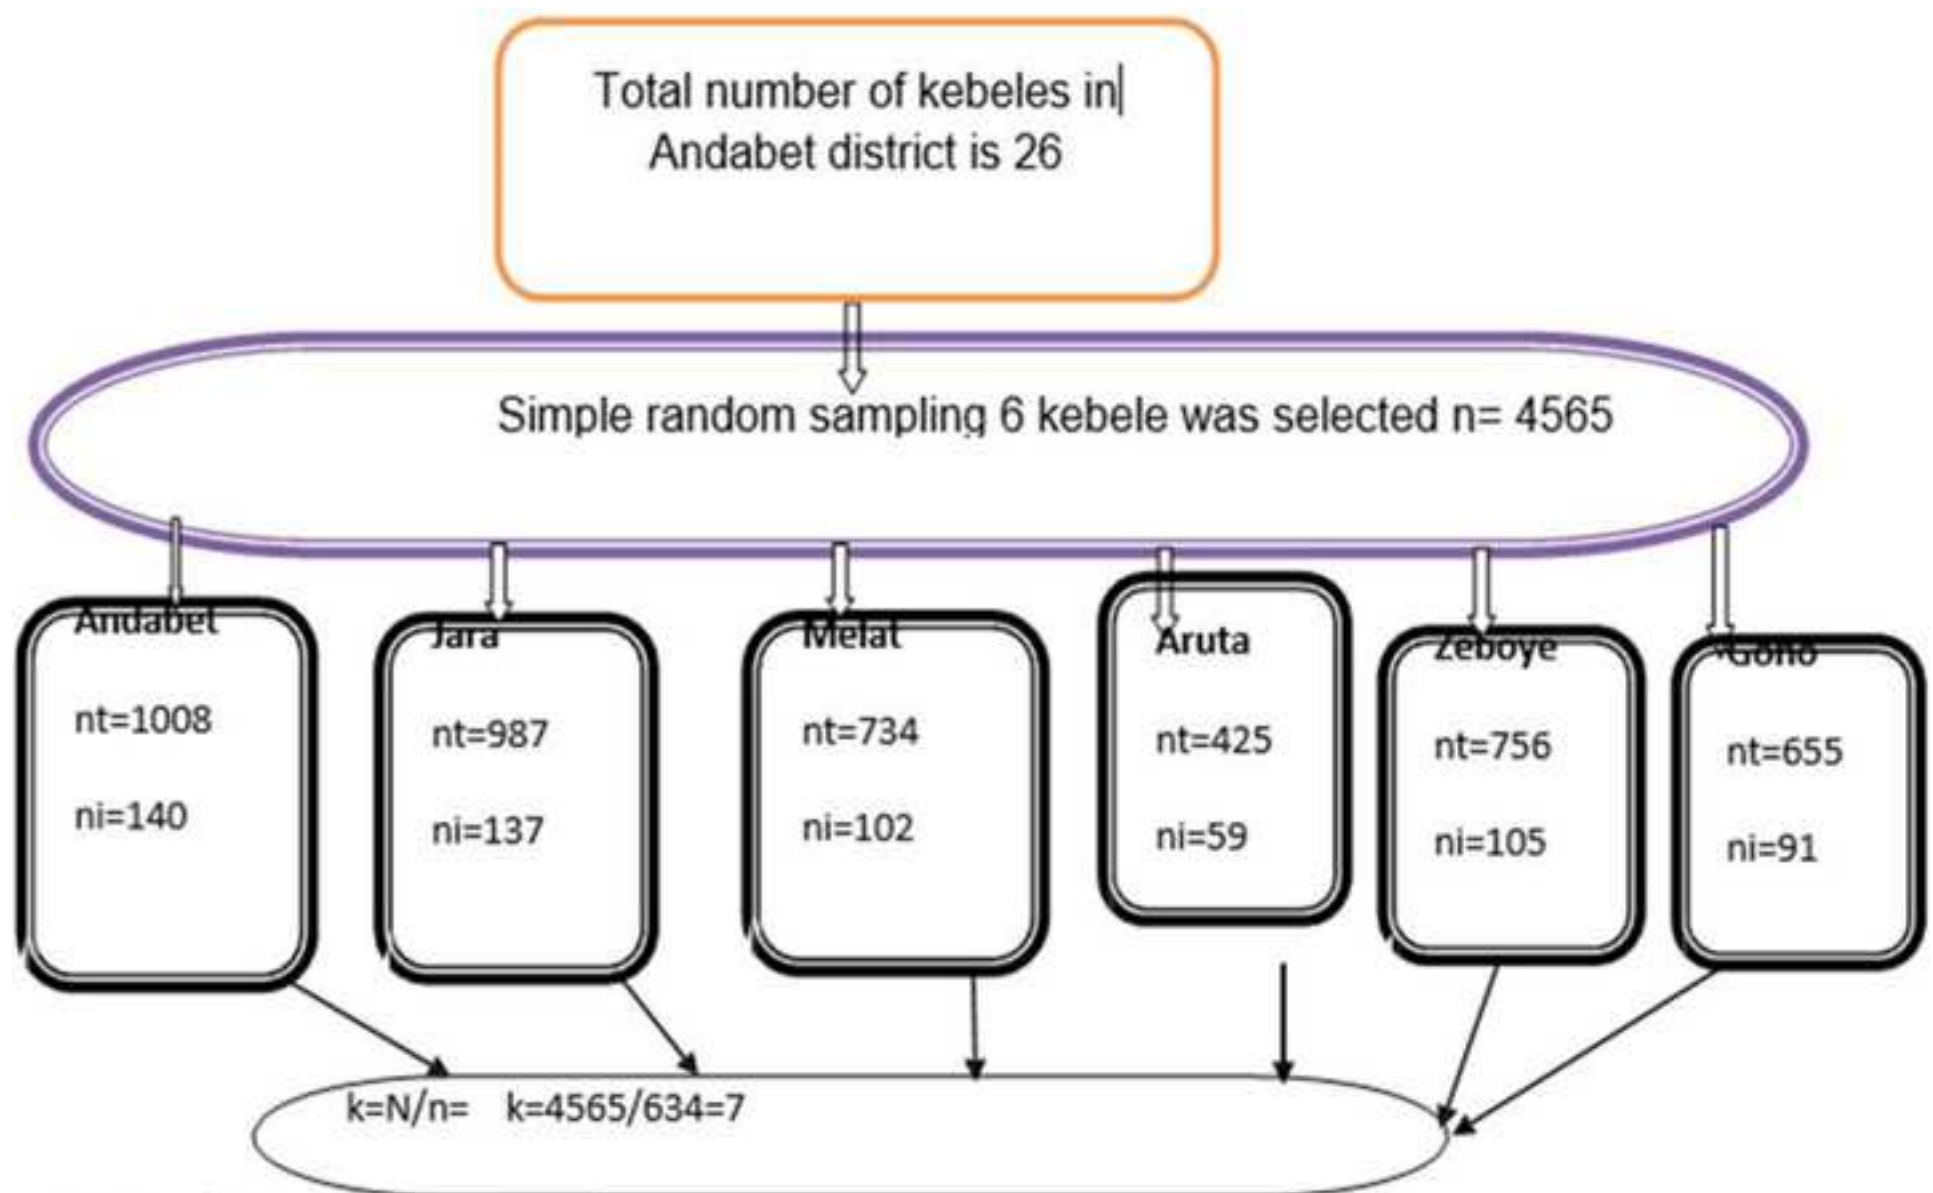

Nt= total population ni= sample

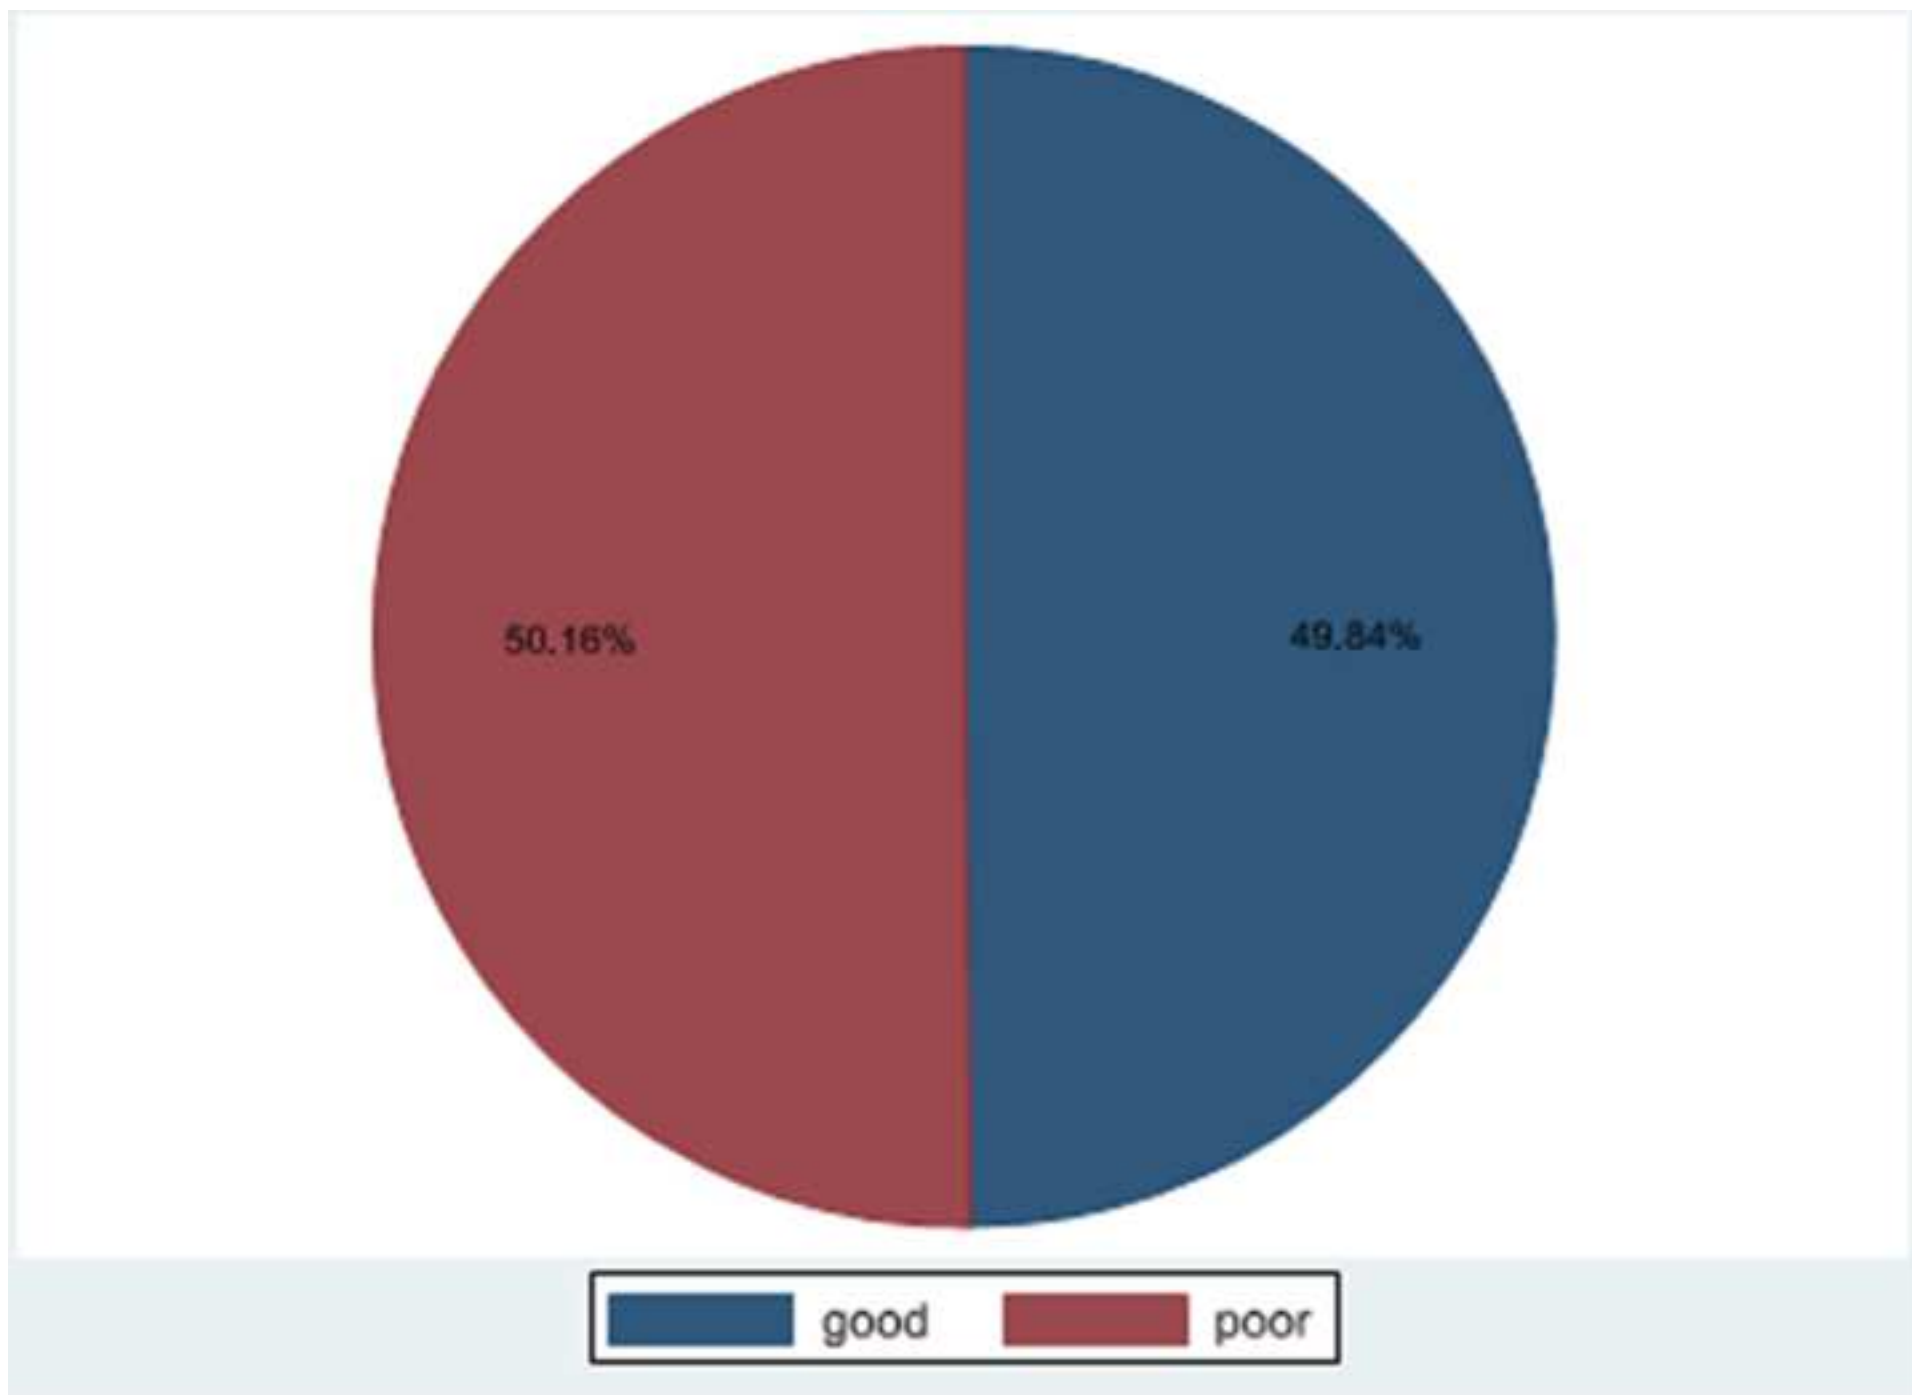



## **Authors' response to Editor's and Reviewer's comments**

**The title “Trachoma prevention practice and Associated Factors among mothers having children aged under nine Years in Andabet District, northwest Ethiopia, 2022:a multilevel analysis”**

Dear Editor, we have revised our manuscript based on the reviewer's suggestions and comments. Here is a response to the reviewer's and your comments and suggestions

### **Author's response to the editor's suggestions/comments**

When you are ready to resubmit, please upload the following:

[1] A letter containing a detailed list of your responses to the review comments and a description of the changes you have made in the manuscript. Please note while forming your response, if your article is accepted, you may have the opportunity to make the peer review history publicly available. The record will include editor decision letters (with reviews) and your responses to reviewer comments. If eligible, we will contact you to opt-in or out.

**Author Response:** thank you, dear editor, we have prepared both the letter containing a detailed list of our responses to the review comments and a description of the changes we have made in the manuscript.

[2] Two versions of the revised manuscript: one with either highlights or tracked changes denoting where the text has been changed; the other a clean version (uploaded as the manuscript file).

**Author Response:** we have prepared the two versions of the manuscript one with tracked change and the other a clean version

Figure Files:

While revising your submission, please upload your figure files to the Preflight Analysis and Conversion Engine (PACE) digital diagnostic tool, <https://pacev2.apexcovantage.com>. PACE helps ensure that figures meet PLOS requirements. To use PACE, you must first register as a user. Then, login and navigate to the UPLOAD tab, where you will find detailed instructions on how to use the tool. If you encounter any issues or have any questions when using PACE, please email us at [figures@plos.org](mailto:figures@plos.org).

**Author Response:** thank you, dear editor, we have uploaded the figure with PACE

Data Requirements:

Please note that, as a condition of publication, PLOS' data policy requires that you make available all data used to draw the conclusions outlined in your manuscript. Data must be deposited in an appropriate repository, included within the body of the manuscript, or uploaded as supporting information. This includes all numerical values that were used to generate graphs, histograms etc..

For an example see here:

<http://www.plosbiology.org/article/info%3Adoi%2F10.1371%2Fjournal.pbio.1001908#s5>.

**Author Response:** thank you, dear editor the datasets used during the current study are available from the corresponding author upon request.

## **Response to the reviewer's comment**

Dear reviewer, we are pleased and appreciate your vigilant and thorough reading of this manuscript and we would like to say thank you for your thoughtful and constructive comments and

suggestions. Based on your comments and suggestions, we had carefully corrected the manuscript one by one. And the whole document had revised.

Reviewer #1: The study is very important for the global trachoma community for decision-making at global/international, national, regional, district, and community levels by all stakeholders involved as Ethiopia currently has an estimated 50% of the global population requiring interventions for trachoma elimination. Addressing the trachoma problem in Ethiopia is potentially wiping out half the global trachoma problem. There is enough information that shows that the study is important and worthy of publication. However, major revision is needed. The overall presentation is poor. Grammar is poor. I suggest the authors find someone who can proofread the many grammatic mistakes.

**Author Response:** thank you very much, dear reviewer, a critical revision has been made to the presentation of the revised manuscript, please see the revised version

1. Objectives should be revised. See my comments in the attached file. They are not clearly articulated.

**Author Response:** thank you, dear reviewer, we have notably improved the objective part of the manuscript .please see the revised version

I believe that the study design is appropriate to address the stated objectives.

The population is clearly described and appropriate for the hypothesis being tested.

The sample size looks sufficient to ensure adequate power to address the hypothesis being tested.

I believe that correct statistical analysis was used to support conclusions although I may not be strong enough on statistical methods.

2. Selection of participants is generally ethical and meets regulatory requirements. However, some women were excluded with weak justification for the exclusion. Better explanation needed in the limitation section.

**Author Response:** thank you, dear reviewer, we have included the explanation in the limitation part of the revised manuscript. , Due to the lack of sign language-trained data collectors and the inability to obtain psychiatric therapists as data collectors, it was not possible to include those mothers with mental illness, hearing problems and a mother having a severe systemic illness prevents her from answering our question but their number was quite insignificant. It was only 4 mothers excluded from the study based on our exclusion criteria.

3. Reviewer #1: The study is a replication of similar studies conducted in other parts of the country and in other countries. The analysis matches the analysis plan. Results are completely presented. The authors need to improve the presentation in general

**Author Response:** thank you, dear reviewer, although there are similar studies conducted, this study explored neglected tropical diseases that became hyper-endemic in our study area after the implementation of SAFE for about 8 to 11 years. Other than the three similar settings, in which SAFE was equally implemented, only our study area remained hyper-endemic having a prevalence of 37 %, it remained a mystery. so we were very interested to study the prevention practice of the community and thus the elimination of an estimated half the global burden moreover, this study uses multi-level modeling taking into account the clustering effect to draw valid inferences and conclusions. Hence this study would be important for employing combined efforts to identified modifiable risk factors and will have significant policy implications in providing support to the affected community.

Dear reviewer, we have improved the presentation critically. please see the revised version

4. Reviewer #1: Conclusions are supported by the data presented but presentation is generally poor.

The limitations of analysis are described but more work needed.

The authors tried to discuss how these data can be helpful to advance our understanding of the topic under study, but more work is needed to improve the presentation of the study.

Authors have poorly addressed the public health relevance of the study. I have made some suggestions in the attached file.

**Author Response:** thank you, dear reviewer, we have critically improved the conclusion, and limitation and addressed the public health relevance of the study in the strength part of the study in the revised version.

5. Reviewer #1: The study is a replication of studies conducted in other countries and in other parts of Ethiopia to assess community practices that influence trachoma prevention and elimination. Half the global population requiring intervention for trachoma elimination is in Ethiopia where some regions/districts have up to 37% TF rate (hyperendemicity) after years of A treatment. This study demonstrates the need to consider support for the introduction of other interventions (F and E) for trachoma elimination in Ethiopia and thus elimination of an estimated half the global burden. I believe that the essential information needed (objectives, methodology, result) is available in this draft of the manuscript. However, overall presentation is poor with too many grammatic errors. Authors should take time to improve the presentation including finding someone who can proofread and edit the manuscript for them. I have made some suggestions in the attached file.

**Author Response:** thanks a lot dear reviewer, we have critically improved the newly revised manuscript as a whole one by one please look the revised manuscript.

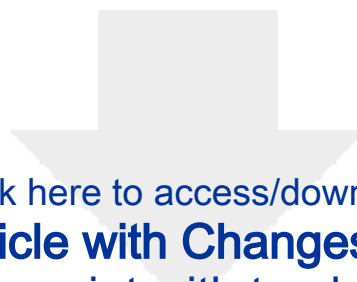

[Click here to access/download](#)

**Revised Article with Changes Highlighted**  
revised manuscript with track change.docx

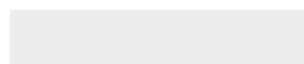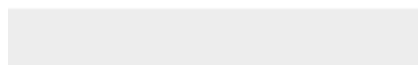

Supplement: pntd.0011433.s004.pdf [file pntd.0011433.s004.pdf]
