# Supplementary material for: Trachoma prevention practice and associated factors among mothers having children aged under nine years in Andabet district, northwest Ethiopia, 2022: A multi-level analysis
Source: PubMed Central journal article supplement (PMC10313038; doi:10.1371/journal.pntd.0011433), 2023-06-30
Supplement: pntd.0011433.s002.pdf [file pntd.0011433.s002.pdf]

# PLOS Neglected Tropical Diseases

## Trachoma prevention practice and associated factors among mothers having children aged under nine years in Andabet district, northwest Ethiopia, 2022 :a multi-level analysis --Manuscript Draft--

|                                                                                                                                                                       |                                                                                                                                                                                                                                                                                                                                                                                                                                                                                                                                                                                                                                                                                                                                                                                                                                                                                                                                                                                                                                                                                                                                                                                                                                                                                                                                                                                                                                                                                                                                                                                                                                                                                                                                                                                                                                                                                                                                                                                                                                                                                                                                                                                    |
|-----------------------------------------------------------------------------------------------------------------------------------------------------------------------|------------------------------------------------------------------------------------------------------------------------------------------------------------------------------------------------------------------------------------------------------------------------------------------------------------------------------------------------------------------------------------------------------------------------------------------------------------------------------------------------------------------------------------------------------------------------------------------------------------------------------------------------------------------------------------------------------------------------------------------------------------------------------------------------------------------------------------------------------------------------------------------------------------------------------------------------------------------------------------------------------------------------------------------------------------------------------------------------------------------------------------------------------------------------------------------------------------------------------------------------------------------------------------------------------------------------------------------------------------------------------------------------------------------------------------------------------------------------------------------------------------------------------------------------------------------------------------------------------------------------------------------------------------------------------------------------------------------------------------------------------------------------------------------------------------------------------------------------------------------------------------------------------------------------------------------------------------------------------------------------------------------------------------------------------------------------------------------------------------------------------------------------------------------------------------|
| <b>Manuscript Number:</b>                                                                                                                                             | PNTD-D-22-01493                                                                                                                                                                                                                                                                                                                                                                                                                                                                                                                                                                                                                                                                                                                                                                                                                                                                                                                                                                                                                                                                                                                                                                                                                                                                                                                                                                                                                                                                                                                                                                                                                                                                                                                                                                                                                                                                                                                                                                                                                                                                                                                                                                    |
| <b>Full Title:</b>                                                                                                                                                    | Trachoma prevention practice and associated factors among mothers having children aged under nine years in Andabet district, northwest Ethiopia, 2022 :a multi-level analysis                                                                                                                                                                                                                                                                                                                                                                                                                                                                                                                                                                                                                                                                                                                                                                                                                                                                                                                                                                                                                                                                                                                                                                                                                                                                                                                                                                                                                                                                                                                                                                                                                                                                                                                                                                                                                                                                                                                                                                                                      |
| <b>Short Title:</b>                                                                                                                                                   | Trachoma prevention practice and associated factors                                                                                                                                                                                                                                                                                                                                                                                                                                                                                                                                                                                                                                                                                                                                                                                                                                                                                                                                                                                                                                                                                                                                                                                                                                                                                                                                                                                                                                                                                                                                                                                                                                                                                                                                                                                                                                                                                                                                                                                                                                                                                                                                |
| <b>Article Type:</b>                                                                                                                                                  | Research Article                                                                                                                                                                                                                                                                                                                                                                                                                                                                                                                                                                                                                                                                                                                                                                                                                                                                                                                                                                                                                                                                                                                                                                                                                                                                                                                                                                                                                                                                                                                                                                                                                                                                                                                                                                                                                                                                                                                                                                                                                                                                                                                                                                   |
| <b>Keywords:</b>                                                                                                                                                      | Key word: Trachoma, Trachoma prevention practice, multi-level analysis, random effect analysis.                                                                                                                                                                                                                                                                                                                                                                                                                                                                                                                                                                                                                                                                                                                                                                                                                                                                                                                                                                                                                                                                                                                                                                                                                                                                                                                                                                                                                                                                                                                                                                                                                                                                                                                                                                                                                                                                                                                                                                                                                                                                                    |
| <b>Abstract:</b>                                                                                                                                                      | <p><b>Abstract</b><br/> <b>Background</b>The world health organization adopted the Surgery, Antibiotic, facial cleanness and environmental improvement (SAFE) strategy for prevention of trachoma and different prevention strategies were implemented in Andabet district. However, the prevalence of trachoma is still higher so it is very important to assess the ground trachoma prevention practice since there is inadequate study on the study area. This study was aimed to assess the magnitude of trachoma prevention practice and the effect of different factors on trachoma prevention practice at different community level.<br/> <b>Objective</b>The study was aimed to assess trachoma prevention practice and associated factors among mothers having children under nine years in Andabet district,Northwest Ethiopia.<br/> <b>Method</b>A community-based cross-sectional study involving 624 participants was conducted from June 1- 30, 2022. Systematic random sampling was conducted to select study participants. Multi-level binary logistic regression analysis was used to identify factors associated with poor TPP. Descriptive and summary statistics were performed and Variables with p value &lt; 0.5 in the best fitted model were declared to be significantly associated with poor TPP.<br/> <b>Results</b>In this study, proportion of poor TPP was found to be 50.16% (95%CI=46.23, 54.08). In the multi variable multi-level logistic regression; having no formal education (AOR= 2.95; 95%CI: 1.41,6.15) and primary education (AOR= 2.33; 95%CI:1.04, 5.24), being farmer (AOR=3.02; 95%CI:1.73,5.28), and merchant (AOR=2.63; 95%CI:1.20, 5.75), time taken to water point &gt;30 minutes (AOR=4.60,95CI:1.30,16.26) and didn't take health education about trachoma (AOR=2.36;95CI:1.16,4.79) were significantly associated with poor TPP.<br/> <b>Conclusion and recommendation</b>The proportion of poor trachoma prevention practice was high relative to other studies. Level of education, occupation, time taken to water source and health education were significantly associated with poor trachoma prevention practice.</p> |
| <b>Additional Information:</b>                                                                                                                                        |                                                                                                                                                                                                                                                                                                                                                                                                                                                                                                                                                                                                                                                                                                                                                                                                                                                                                                                                                                                                                                                                                                                                                                                                                                                                                                                                                                                                                                                                                                                                                                                                                                                                                                                                                                                                                                                                                                                                                                                                                                                                                                                                                                                    |
| <b>Question</b>                                                                                                                                                       | <b>Response</b>                                                                                                                                                                                                                                                                                                                                                                                                                                                                                                                                                                                                                                                                                                                                                                                                                                                                                                                                                                                                                                                                                                                                                                                                                                                                                                                                                                                                                                                                                                                                                                                                                                                                                                                                                                                                                                                                                                                                                                                                                                                                                                                                                                    |
| <b>Government Employee</b>                                                                                                                                            | No - No authors are employees of the U.S. government.                                                                                                                                                                                                                                                                                                                                                                                                                                                                                                                                                                                                                                                                                                                                                                                                                                                                                                                                                                                                                                                                                                                                                                                                                                                                                                                                                                                                                                                                                                                                                                                                                                                                                                                                                                                                                                                                                                                                                                                                                                                                                                                              |
| Are you or any of the contributing authors an employee of the United States government?                                                                               |                                                                                                                                                                                                                                                                                                                                                                                                                                                                                                                                                                                                                                                                                                                                                                                                                                                                                                                                                                                                                                                                                                                                                                                                                                                                                                                                                                                                                                                                                                                                                                                                                                                                                                                                                                                                                                                                                                                                                                                                                                                                                                                                                                                    |
| Manuscripts authored by one or more US Government employees are not copyrighted, but are licensed under a <a href="#">CC0 Public Domain Dedication</a> , which allows |                                                                                                                                                                                                                                                                                                                                                                                                                                                                                                                                                                                                                                                                                                                                                                                                                                                                                                                                                                                                                                                                                                                                                                                                                                                                                                                                                                                                                                                                                                                                                                                                                                                                                                                                                                                                                                                                                                                                                                                                                                                                                                                                                                                    |

|                                                                                                                                                                                                                                                                                                                                                                                                                                                                                                 |                                                                                                                                                                                                            |
|-------------------------------------------------------------------------------------------------------------------------------------------------------------------------------------------------------------------------------------------------------------------------------------------------------------------------------------------------------------------------------------------------------------------------------------------------------------------------------------------------|------------------------------------------------------------------------------------------------------------------------------------------------------------------------------------------------------------|
| <p>unlimited distribution and reuse of the article for any lawful purpose. This is a legal requirement for US Government employees.</p> <p>This will be typeset if the manuscript is accepted for publication.</p>                                                                                                                                                                                                                                                                              |                                                                                                                                                                                                            |
| <p><b>Financial Disclosure</b></p> <p>Enter a financial disclosure statement that describes the sources of funding for the work included in this submission and the role the funder(s) played. This includes grants and any commercial funding of the work or authors.</p> <p>This statement will be typeset if the manuscript is accepted for publication.</p> <p>Review the <a href="#">submission guidelines</a> and the instructions link below for detailed requirements and guidance.</p> | <p>The University of Gondar funded this study. The funding institution did not involve in the design of the study, data collection, analysis, or interpretation of the results and manuscript writing.</p> |
| <p><b>Competing Interests</b></p> <p>On behalf of all authors, disclose any competing interests that could be perceived to bias this work.</p> <p>This statement will be typeset if the manuscript is accepted for publication.</p> <p>Review the instructions link below and PLOS NTDs' <a href="#">competing interests</a> policy to determine what information must be disclosed at submission.</p>                                                                                          | <p>The authors declare that they have no competing interest</p>                                                                                                                                            |
| <p><b>Data Availability</b></p> <p>Provide a <b>Data Availability Statement</b> in the box below. This statement should detail where the data used in this submission can be accessed. This statement will be typeset if the manuscript is accepted for publication.</p>                                                                                                                                                                                                                        | <p>The data set used and analyzed during this study is available at UOG</p>                                                                                                                                |

Before publication, authors are required to make all data underlying their findings fully available, without restriction. Review our [PLOS Data Policy](#) page for detailed information on this policy. Instructions for writing your Data Availability statement can be accessed via the Instructions link below.

1 **Trachoma prevention practice and associated factors among mothers having**  
2 **children aged under nine years in Andabet district, northwest Ethiopia, 2022 :a**  
3 **multi-level analysis**

4

5 Zufan Alamrie Asmare <sup>1\*</sup>, Natnael Lakachew Assefa <sup>2</sup>, Dagmawi Abebe<sup>3</sup>, Solomon  
6 Gedlu Nigatu <sup>4</sup>, Yezinash Addis Alimaw <sup>2</sup>

7 1 Department of ophthalmology, School of Medicine and Health Science, Debre Tabor  
8 University, Debre Tabor, Ethiopia

9 2 Department of optometry, School of Medicine and Health Science, University of Gondar,  
10 Gondar, Ethiopia

11 3 Department of ophthalmology, School of Medicine and Health Science, University of  
12 Gondar, Gondar, Ethiopia

13 4 Department of Epidemiology & biostatistics, School of Medicine and Health Science,  
14 University of Gondar, Gondar, Ethiopia

15

16 **\*corresponding author**

17 Zufan Alamrie Asmare (Debre Tabor University School of Medicine and Health  
18 Science )

19 EMAIL: [zufanalamrie2@gmail.com](mailto:zufanalamrie2@gmail.com)

20 PHONE NO; +251937374268,

21 P.O BOX- 272

22

23 **Abstract**

24 **Background**

25 The world health organization adopted the Surgery, Antibiotic, facial cleanness and  
26 environmental improvement (SAFE) strategy for prevention of trachoma and different  
27 prevention strategies were implemented in Andabet district. However, the prevalence of  
28 trachoma is still higher so it is very important to assess the ground trachoma prevention  
29 practice since there is inadequate study on the study area. **This study was aimed to**  
30 **assess the magnitude of trachoma prevention practice and the effect of different factors**  
31 **on trachoma prevention practice at different community level.** [community levels \(plural\)](#)

32 **Objective**

[Objective almost same as aim](#)

33 **The study was aimed to assess trachoma prevention practice and associated factors**  
34 **among mothers having children under nine years in Andabet district, Northwest Ethiopia.**

35 **Method**

36 A community-based cross-sectional study involving 624 participants was conducted  
37 from June 1- 30, 2022. Systematic random sampling was conducted to select study  
38 participants. Multi-level binary logistic regression analysis was used to identify factors  
39 associated with poor TPP. Descriptive and summary statistics were performed and  
40 Variables with p value < 0.5 in the best fitted model were declared to be significantly  
41 associated with poor TPP.

42 **Results**

43 In this study, proportion of poor TPP was found to be 50.16% (95%CI=46.23, 54.08). In  
44 the multi variable multi-level logistic regression; having no formal education (AOR=  
45 2.95; 95%CI: 1.41,6.15) and primary education (AOR= 2.33; 95%CI:1.04, 5.24), being

46 farmer (AOR=3.02; 95%CI:1.73,5.28), and merchant (AOR=2.63; 95%CI:1.20, 5.75),  
47 time taken to water point >30 minutes (AOR=4.60,95CI:1.30,16.26) and didn't take  
48 health education about trachoma (AOR=2.36;95CI:1.16,4.79) were significantly  
49 associated with poor TPP.

50 **Conclusion and recommendation** There is no recommendation. Consider removing 'and  
recommendation' if you want to keep word count low.

51 The proportion of poor trachoma prevention practice was high relative to other studies.  
52 Level of education, occupation, time taken to water source and health education were  
53 significantly associated with poor trachoma prevention practice.

54 **Key word:** Trachoma, Trachoma prevention practice, multi-level analysis, random effect  
55 analysis.

#### 56 **Author summary**

a neglected tropical disease; no 's'.

57 Trachoma is a neglected tropical diseases, It has been one of the most devastating  
58 diseases affecting 60 to 90 % of children, especially under nine years. In Ethiopia there  
59 are 10.2 million cases of trachoma, in which Amhara region takes the lion share. lion's share

60 Trachoma elimination has focused on the Surgery & Antibiotic elements of the SAFE  
61 strategy. However, Facial cleanliness & Environmental improvements are critical for  
62 sustained progress towards elimination. The rationale behind F and E components of SAFE  
63 strategy is that changes in hygiene behavior and improvement in environmental infrastructure  
64 might be able to reduce prevalence of trachoma and thus be an ideal long term strategies for  
65 trachoma control. This paper adds to the literature by illustrating the status of trachoma  
66 prevention practice strategy and associated factors in Ethiopia and may support trachoma  
67 elimination in Ethiopia and globally.

Consider rewriting this section: Half global population requiring intervention for trachoma elimination is in Ethiopia where some regions/districts have up to 37% TF rate after years of A treatment. This study demonstrates the need to consider support for the introduction of other interventions (F and E) for trachoma elimination in Ethiopia and thus elimination of an estimated half the global burden.

#### 68 **Introduction**

69 Trachoma is caused by *Chlamydia trachomatis*, a neglected tropical <sup>no 's'</sup> **diseases** (1, 2). It  
70 has been one of the most devastating diseases affecting 60 to 90 % of children,  
71 especially under nine years (3, 4). <sup>Space</sup> **Trachoma** affects their school performance, inability to  
72 lead a healthy and productive life (3). Moreover, this devastating <sup>no 's'</sup> **diseases** can result in  
73 vision loss, stigma, reduced productivity and economic loss of US\$ 2.9-5.3 billion  
74 annually, **and half of the burden of trachoma is shared by Ethiopia solely (5, 6).** 'global burden'

75 Globally, trachoma causes 1.9 million visual impairments and 1.2 million blindness. It is  
76 still endemic in 44 countries (2, 7). More than 80% of active trachoma is concentrated  
77 in Africa, nearly half is in sub-Saharan Africa (8). In Ethiopia there are 10.2 million  
78 cases of trachoma, in which Amhara region takes the lion share (62.6%) (5, 9).

79 According to different studies conducted in Ethiopia, the prevalence of poor prevention  
80 practice is high, which ranges between 45.5 and 64.4% (1, 10). Evidences have shown  
81 that individual level factors such as age of the mother, husband education, basic  
82 knowledge about trachoma, mothers attitude towards trachoma, taking health education  
83 about trachoma, time taken to water point and frequency of getting water and also  
84 community level factors such as Residence and types of water source were affect  
85 trachoma prevention practice (1, 10-19)

86 Even though there are different strategies to tackle trachoma, like WHO which  
87 implemented SAFE (surgery for advanced disease, Antibiotic, facial cleanliness and  
88 Environmental improvement) to control the diseases, **working on prevention practice**  
89 **has a paramount advantage since poor prevention practice is primarily responsible**  
90 **for the increasing prevalence of trachoma (11, 20-22).** ↓

91 **Proper practicing of F (facial cleanness) and E (Environmental improvement) is**  
92 **responsible for 58.7% reduction of trachoma prevalence at all ages and 37.4% in**

93 children (23). moreover, trachoma was disappeared from most of United States of  
94 America and Western Europe before antibiotics was discovered (23)

95 The rationale behind F and E components of SAFE strategy is that changes in hygiene  
96 behavior and improvement in environmental infrastructure might be able to reduce  
97 prevalence of trachoma and thus be an ideal long term strategies for trachoma control

98 (24). Good argument for introduction of F and E especially with the results of

99 After 8 to 11 years implementation of SAFE in the study area Andabet, North west  
100 Ethiopia , the prevalence of TF (trachomatous follicular) was 37% in 2017. Which is  
101 hyper endemic; other than the other 3 similar settings (9, 15). Studies on the scope of  
102 trachoma prevention practice (F and E components of SAFE) and its associated factors  
103 are limited. Even those few studies are failed to account for the existence of community  
104 level variations of trachoma prevention practice. In order to have good trachoma  
105 prevention practice, interventions at both individual and community level factors should  
106 be taken in to account.

107 Therefore, this study aimed to assess trachoma prevention practice and associated  
108 factors among mothers having children aged under nine years in Andabet district with a  
109 focus on both individual and community level factors. Finally, the findings of this study  
110 will be used as a base line for responsible bodies (policy makers, governmental and non-  
111 governmental organizations) in order to have appropriate decision and for further  
112 investigation by future researchers.

## 113 **Methods**

### 114 **Study area and period**

115 This study was conducted in Andabet district, south Gondar zone, Amhara region,  
116 Ethiopia from June 1-30, 2022.The district is located 717 km from Addis Ababa and



117 150km east of Bahirdar, the capital city of Amhara region. Its total population is 152,683  
118 and according to 2022 data of Andabet district administration office; the district has 26  
119 kebeles with 34765 household. It has 1 primary health care center and 2 health posts.  
120 Its climate condition is Woinadega

## 121 **Study design**

122 Community based cross-sectional design was used with systematic random sampling  
123 method from June 1-30, 2022.

## 124 **Source and study population**

125 The source and study population of the study were Mothers having children aged under  
126 nine years who had been living in Andabet district, Northwest Ethiopia. Mothers who  
127 had at least one child of age less than nine years and those lived in the district at least  
128 for six months were included in the study.

## 129 **Exclusion criteria**

130 Mothers with mental illness, other serious systemic illness, and hearing problem  
131 were excluded from the study.

Is the proportion of women excluded significant.  
Please provide rationale for the exclusion

Why? Is this not discrimination?  
what about sign languages for hearing problems, other systemic illness?

## 132 **Sample size determination**

### 133 **Sample size for the proportion of trachoma prevention practice**

134 The sample size (n) was determined using single population proportion

135 formula by taking Proportion of poor practice is 48.5% from similar study in

136 Oromia

Please consider finding someone who can proofread and edit to

My statistics is limited to assess sample size selection

137  $n = (Z_{\alpha/2})^2 \frac{P(1-P)}{d^2}$

138 n – Sample size

139 Z - Confidence interval at 95%= 1.96

140 P – Proportion of poor practice is 48.5% from similar study in Oromia, Ethiopia (12).

141 d - Marginal error=5%

142  $n=1.96^2 \times .485 \times .515 / (0.05 \times 0.05) = 384$

143 Finally, after considering a 10% non- response rate and design effect (1.5), the required  
144 sample size for this particular study was 634.

### 145 **Ethical consideration**

146 The study adhered to the tenets of the Declaration of Helsinki and approval was sought  
147 and obtained from the Ethical Review Board of College of Medicine and Health  
148 Sciences, University of Gondar. Permission letter was obtained from Andabet district  
149 administrative office and written informed consents were obtained from all voluntary  
150 participants. The participants were informed of the study would not impose harm to  
151 them. There were no personal identifiers and confidentiality of the study participants  
152 were maintained at all stages of data processing.. Informed verbal consent was  
153 obtained from each respondent and Confidentiality was kept by using codes and by  
154 avoiding personal identifiers.

### 155 **Sampling technique and procedure**

156 A multistage sampling technique was used during the sampling process. Six Kebeles out  
157 of 26 Kebeles was selected by using a simple random sampling method after a list of  
158 kebeles was obtained from the Andabet district administration bureau. The total sample  
159 size of the study was allocated proportionally for each Kebele based on number of  
160 mothers having children aged under nine years that were found in each Kebele. Finally,  
161 the households were chosen using a systematic random sample technique.

162 To carry out systematic random sampling, sampling frames were collected from each  
163 kebele. The total estimated number of study population was 4565. Based on  
164 study population and sample size required from each kebele, we calculated the interval  
165 between households and found to be seven. Then the first household was randomly  
166 selected from 1 to 7 serial number of sampling and the remaining households were  
167 selected at every 7<sup>th</sup> interval. If mothers in the household did not fulfill the inclusion  
168 criteria and/or **did not** found with two repeated visits the next household was taken.

## 169 **Variables of the study**

### 170 **Dependent variables**

171 The dependent variable was mother's trachoma prevention practice.

### 172 **Independent variables**

173 For this study the independent variables were classified as individual and community  
174 level variables. The individual level variables were Age of the mother, **Mother education**  
175 **,Husband education** ,Occupation of the mother ,Religion, **Marital status** **Number of**  
176 **children under nine** ,age of the youngest child, Sex of the youngest child, Basic  
177 trachoma Knowledge, Attitude towards trachoma and Amount of water used per  
178 person per day. Community level variables for this study were Residence,Type of water  
179 source and Community women illiteracy level.

### 180 **Operational definition**

181 **Trachoma prevention practice:** **It is the assessment of mother practice towards two out**  
182 **of four components of WHO SAFE strategy and is only facial cleanness (F) and**  
183 **environmental hygiene (E).it was Measured using 10 items all yes/no and classified as**  
184 **good and poor based on the mean value (1).**

185 **Knowledge:** of mother's knowledge towards trachoma was assessed, using 15  
186 yes/no questions and classified as good and poor based on the mean of the scores  
187 (10)

188 **Attitude:** assessed using 7 agree/disagree statements and classified as good and poor  
189 based on mean of score (10). Those who scoring greater than the mean were considered  
190 to have good attitude (10, 25, 26)

191 **Facial cleanliness:** measured as absence of ocular discharge, nasal discharge, and fly  
192 (s) on eye during the time of examination. If there is one from the listed, it is considered  
193 as not clean (27).

194 **Ocular discharge:** Is any discharge around and/or in the eye at time of examination (27).

195 **Nasal discharge:** any discharge seen in the nose at time of examination (27).

196 **Fly-eye:** at least one fly contact with the eyelid margin during eye observation (18).

197 **Time taken to water source:** collection time does not exceed 30 minutes.

198 **Availability of water:** An average person uses about 20 liters of water per day for  
199 Domestic and personal hygiene (28).

200 **Utilization of waste disposal pit:** if there is discarded unwanted agricultural product in  
201 the pit , if there is domestic products in the pits or if there is presence of ashes (burned  
202 sign of waste) ,it was considered as utilized, otherwise not (29).

203 **Latrine utilization:** Latrines that displayed at least two signs of latrine utilization during  
204 the observation were considered latrine utilization "signs of use," such as footpath to the  
205 Latrine, fresh excreta inside the latrine, and presence of splash of urine, and absence of  
206 spider web of the squat. If there were at least two from the above it was considered as  
207 utilized (30).

208 **Cleanness of compound:** if the household (residential ) compound was free from solid  
209 waste, liquid wastes, feces, animal dungs, and domestic waste, it was considered as  
210 clean (10).

211 **Health education:** was acquired education about trachoma and trachoma prevention  
212 practice at least once in the previous two years (29).

213 **Cleanness of latrine:** if there is at least one from these; human excreta out of the pit,  
214 stagnant urine, and unwanted trash in the floor of latrine, it was not considered as clean  
215 (31) .

216 **Community women illiteracy:** it is the aggregated community level variable derived from  
217 maternal educational level and measured as the proportion of women with no formal  
218 education at the kebele/community level. Based on a median value it was then dived into  
219 low ( mothers from communities with lower illiteracy level ) and high (mothers from  
220 communities with higher illiteracy level) categories (32, 33)

## 221 **Data collection procedure and quality**

### 222 **control**

223 Quantitative data was collected through face to face interview and observation. Which  
224 were adapted from different literatures and modified to the context. Data was collected by  
225 trained four BSc ophthalmic nurses using interviewer administered Amharic version  
226 questioner which is translated from English language and through observation.

227 One day training was given to data collectors by the principal investigator. The principal  
228 investigator supervised the data collection on daily bases. Pre-testing was conducted on  
229 5% of participants that was from Kebele, which was not selected for the study.

230 Based on the finding of the pre-test, data collectors were re-oriented and the  
231 questionnaire was modified accordingly. The reliability of the question for trachoma

232 prevention practice was checked by cronbach alpha and the scale reliability coefficient  
233 was 0.795

## 234 **Data processing and Statistical** 235 **analysis**

236 Data was entered into Epi-Data version 4.6 then data cleaning and coding was done  
237 using STATA version 16. STATA was used for analyses (both descriptive and analytical  
238 analyses). Descriptive statistics were reported using text, tables, and figures. Proportion  
239 of poor trachoma prevention practice with its 95% Confidence interval (CI) was reported.  
240 To assess factors associated with trachoma prevention practice, a multilevel logistic  
241 regression analysis was used. This is used because of mothers are nested in  
242 kebeles/community, which violate the independent assumption of the standard logistic  
243 regression model. Besides, the random effect parameters and the sampling technique  
244 also dictate us to use a multilevel analysis.

245 While conducting a multilevel binary logistic regression analysis, we fitted both random  
246 effect and fixed effect analyses. The random effect parameter, intraclass correlation  
247 coefficient (ICC) quantifies the degree of heterogeneity of trachoma prevention practice  
248 between clusters and ICC of more than 10% indicates that accounting the cluster level  
249 variability of trachoma preventive practice using multi-level analysis is appropriate.  
250 Moreover, proportion change in variance (PCV), and median odds ratio (MOR) were  
251 assessed.

252 In fixed effect analysis, four models were fitted; model 1 (with the outcome variable  
253 only), model 2 (incorporating individual level variables), model 3 (fitted with community  
254 level variables), and model 4 (incorporating both individual and community level  
255 variables simultaneously). Among the four models fitted, the last model (model 4) was  
256 selected as the best fitted model since it has the lowest deviance and highest PCV.

257

258 Eligible variables for the multivariable multilevel analysis were selected if their p value in  
259 the bivariable analysis was  $<0.25$ . For all models fitted, the adjusted odds ratio (AOR)  
260 with its 95% CI were reported. However, the interpretations are based on the final model,  
261 the best fit model. Finally, variables with  $p<0.05$  in the final model were declared to be  
262 significantly associated with trachoma prevention practice.

## 263 **Result**

### 264 **Socio-demographic characteristics of study participants**

Four hundred and ninety six

265 A total of 624 study participants were included in the study. Forty hundred ninety-six  
266 (79.49%), mothers had children aged less than or equal to two years with a mean age of  
267 2. Three hundred fifty-seven (57.2%) mothers did not receive formal education and 554  
268 (88.78%) mothers didn't get health education about trachoma (Table 1).

### 269 **Environmental and related characteristics**

270 Around three-fourth (73.24%) of mothers got water from river and 342 (54.81%) of them  
271 travel more than 30 minutes to get water. Around two third (64.9%) and 354(56.73%) of  
272 mothers had poor basic trachoma knowledge and attitude towards trachoma. Regarding  
273 cleanness of the compound, 448 (71.79%) of mothers had unclean house compound  
274 (Table 2)

### 275 **Magnitude of Trachoma prevention practice**

276 The overall proportion of poor trachoma prevention practice was 50.16 (95%CI: 46.23%,  
277 54.08%) (Figure 1). More than two third of mothers had clean face, 427 (68.43%) and  
278 three fourth of children in the study had unclean face, 457 (73.24%). More than three  
279 fourth (77.40%) of the mothers uses latrine (Table 3).

## 280 **Factors associated with trachoma prevention practice**

281 In the multivariable multi-level logistic regression, mothers who didn't take formal  
282 education and who had primary education level had 2.95 and 2.33 times higher odds of  
283 poor trachoma prevention practice as compared to those mothers who had secondary  
284 and above education level (AOR=2.95; 95%CI:1.41,6.15) and (AOR= 2.33; 1.04,5.24)  
285 respectively.

286 Mothers who were farmer and merchant had 3.02 and 2.63 times higher odds of poor  
287 trachoma prevention practice as compared to those mothers who were housewife  
288 (AOR=3.02; 95%CI:1.73, 5.28) and (AOR=2.63; 95%CI:1.20, 5.75) respectively.

289 Regarding time taken to water point, mothers who traveled >30 minute to the water point  
290 had 4.60 (AOR= 4.60, 95CI:1.30, 16.26) times higher odds of poor trachoma prevention  
291 practice as compared to those mothers who traveled ≤30 minute. Mothers who didn't take  
292 health education about trachoma had 2.36 (AOR= 2.36; 95%CI:1.16, 4.79) times higher  
293 odds of poor trachoma prevention practice as compared to those mothers who had taken  
294 health education about trachoma (Table 5)

## 295 **Discussion**

296 The aim of this study was to assess trachoma prevention practice and associated factors  
297 in andabet district, Northwest Ethiopia. In this study, the proportion of poor trachoma  
298 prevention practice was 50.16%. This finding is in line with a study conducted in Oromia  
299 Ethiopia (1). However, it is lower than a study conducted in Tigray.(10).The possible  
300 explanation for this discrepancy with a study done in tigray might be community based  
301 trachoma interventions, particularly those focused on increasing awareness about the  
302 diseases have periodically expanded and organizations like carter have been doing their  
303 duties in our study area (34). Our study finding is higher than a study conducted in north



304 Vietnam and lemo district of southern Ethiopia (12, 35) The discrepancy from study done  
305 in Vietnam might be due to sociocultural and economic difference that is Vietnam is  
306 relatively developed country with accessible water and health service like well oriented  
307 health education programs about trachoma (36) and also the study participants of a  
308 study done in Vietnam are school aged children who got trachoma prevention related  
309 information from their school (35).while the discrepancy in lemo might be due to study  
310 time period difference

311 The study at hand found that maternal educational level is associated with trachoma  
312 prevention practice. Mother who didn't take formal education and had primary education  
313 level had higher odds of poor prevention practice as compared with those mothers who  
314 had secondary and above education level. The possible explanation may be those who  
315 didn't take formal education and only receive primary education lose a thorough  
316 understanding of the disease, mechanism of transmission and prevention mechanisms;  
317 therefore, they might not take measures to prevent trachoma and the odds of poor  
318 practice might be increased (12) (35, 36)

319

320 Having not taken health education about trachoma is also associated with higher odds of  
321 poor trachoma prevention practice as compared to their counterparts in the current  
322 study. This finding is supported by study conducted in lemo district (12). This is due to  
323 the fact that mothers who didn't take health education program are more vulnerable to  
324 cultural misconceptions about use water for environmental sanitation and personal  
325 hygiene (11, 37) Besides, mothers who didn't got health education program didn't  
326 have practice skills needed to adopt for prevention of trachoma (11) (37, 38)

327 Maternal occupation is another factor that is associated with trachoma prevention  
328 practice in which mothers whose occupation is farmer and merchant is associated with

329 higher odds of poor trachoma prevention practice as compared to being housewife. The  
330 possible reason might be according to our study 88% of farmers and 93.6% of merchants  
331 didn't take health education about trachoma. Also, 81.5% of farmers travel more than 30  
332 minutes to get water. The other possible reason might be those mothers who are farmer  
333 and merchant are less efficient in terms of time for facial cleanness and environmental  
334 improvement than housewives.

335 Consistent with other studies conducted in Kenya and Oromia (1, 39), in this study,  
336 longer time to water point is significantly associated with poor trachoma prevention  
337 practice; those who took greater than 30 minutes to water point was associated with  
338 higher odds of poor trachoma prevention practice as compared to those who takes less  
339 than or equal 30 minutes to the water point. This may be due to the link between time  
340 wasted getting water and water scarcity. The more loss of time to get water, the more  
341 they save the water and the shortage of water in turn deteriorates the hygienic practice  
342 of mothers (39).

## 343 **7 Strength and limitation of the study**

344 This study assessed important topics that has both clinical and public health importance  
345 accounting the variability of poor trachoma prevention practice between  
346 kebeles/communities. The use of multi-level logistic regression analysis allows to have  
347 the appropriate estimate. However, this study is not without limitation. Social desirability  
348 bias might be introduced while assessing sensitive variables such as (fomite sharing  
349 practice and infant feces disposal to latrine). In addition it lacks repeated observation  
350 and this may alter the outcome variable in either direction

## 351 **8 Conclusion**

352 The proportion of poor trachoma prevention practice was high relative to other studies.  
353 Those who didn't take formal education, who had primary education level, those who take  
354 more time to water point (>30 minutes), those who didn't taken health education about  
355 trachoma and those who were **farmer and merchant** were at higher odds of poor  
356 trachoma prevention practice.

## 357 **9 Recommendations**

358 To governmental and non-governmental organizations: focus on facial cleanness (F)  
359 and Environmental improvement (E) components of SAFE.

360 To amhara region trachoma control program: planning health education program and  
361 enhancing water supply are recommended to improve trachoma prevention practice  
362 overall.

*Any recommendation for the global trachoma community who should be very interested in what happens in Ethiopia?*

363 To Andabet district health office: special attention should be given for those mothers with  
364 no formal education and primary education and who are away from water source.  
365 Besides, health education programs about trachoma should be strengthened.

## 366 **Acknowledgment**

367 **First and foremost our special appreciation goes to university of Gondar for its financial**  
368 **support as well as giving this opportunity.** We are also **also** delighted to thank the  
369 department of optometry and its staffs who **support** us while **conducting this paper.**  
370 Lastly but not least, we would like to give our appreciation and thanks to our study  
371 participants and data collectors.

## 372 **References**

- 373 1. Abera T, Tilahun W, Waqqira I. Trachoma prevention practice among mothers with child age of  
374 under-9 years and factors associated in rural district of Oromia Region, Ethiopia: Community based cross-  
375 sectional study. World Journal of Advanced Research and Reviews. 2021;10(1):245-57.

- 376 2. WHO. Trachoma. 7,march 2022.
- 377 3. Frick KD, Hanson CL, Jacobson GA. Global burden of trachoma and economics of the disease. The  
378 American journal of tropical medicine and hygiene. 2003;69(5\_suppl\_1):1-10.
- 379 4. ETAT. Trachoma - a women and children's health issue. 2020.
- 380 5. Stewart AE, Zerihun M, Gessese D, Melak B, Sata E, Nute AW, et al. Progress to eliminate  
381 trachoma as a public health problem in Amhara National Regional State, Ethiopia: results of 152 population-  
382 based surveys. The American journal of tropical medicine and hygiene. 2019;101(6):1286.
- 383 6. Bamani S, King JD, Dembele M, Coulibaly F, Sankara D, Kamissoko Y, et al. Where do we go  
384 from here? Prevalence of trachoma three years after stopping mass distribution of antibiotics in the regions  
385 of Kayes and Koulikoro, Mali. PLoS neglected tropical diseases. 2010;4(7):e734.
- 386 7. WHO. Weekly epidemiological record. 2019.
- 387 8. Stewart AE, Zerihun M, Gessese D, Melak B, Sata E, Nute AW, et al. Progress to eliminate  
388 trachoma as a public health problem in Amhara National Regional State, Ethiopia: results of 152 population-  
389 based surveys. 2019;101(6):1286.
- 390 9. Nash SD, Astale T, Nute AW, Bethea D, Chernet A, Sata E, et al. Population-based prevalence of  
391 Chlamydia trachomatis infection and antibodies in four districts with varying levels of trachoma endemicity  
392 in Amhara, Ethiopia. The American journal of tropical medicine and hygiene. 2021;104(1):207.
- 393 10. Gebretnsae H, Mamo N, Teklemariam T, Fenta K, Gebrehiwet T, Berhe A, et al. Knowledge,  
394 attitudes, and practices about trachoma in rural communities of Tigray Region, Northern Ethiopia:  
395 implications for prevention and control. Journal of environmental and public health. 2020;2020.
- 396 11. Njomo DW, Karimurio J, Odhiambo GO, Mukuria M, Wanyama EB, Rono HK, et al. Knowledge,  
397 practices and perceptions of trachoma and its control among communities of Narok County, Kenya. Tropical  
398 diseases, travel medicine and vaccines. 2016;2(1):1-10.
- 399 12. MuluneshG M MS, Minichil B. Trachoma prevention practice and associated factors in rural lemo  
400 district. 2021.
- 401 13. Tadesse B, Worku A, Kumie A, Yimer SA. The burden of and risk factors for active trachoma in the  
402 North and South Wollo Zones of Amhara Region, Ethiopia: a cross-sectional study. Infectious diseases of  
403 poverty. 2017;6(1):1-12.

- 404 14. Asfaw M, Zolfo M, Negussu N, Tadesse F, Tadele T, Sisay A, et al. Towards the trachoma  
405 elimination target in the Southern region of Ethiopia: How well is the SAFE strategy being implemented?  
406 *The Journal of Infection in Developing Countries*. 2020;14(06.1):3S-9S.
- 407 15. Lavett DK, Lansingh VC, Carter MJ, Eckert KA, Silva JC. Will the SAFE strategy be sufficient to  
408 eliminate trachoma by 2020? Puzzlements and possible solutions. *The Scientific World Journal*. 2013;2013.
- 409 16. Aiemjoy K, Stoller NE, Gebresilliasie S, Shiferaw A, Tadesse Z, Sewnet T, et al. ‘If an eye is  
410 washed properly, it means it would see clearly’: a mixed methods study of face washing knowledge,  
411 attitudes, and behaviors in rural Ethiopia. *PLoS neglected tropical diseases*. 2016;10(10):e0005099.
- 412 17. West SK, Nanji AA, Mkocho H, Munoz B, Gaydos C, Quinn TC. Evidence for contamination with  
413 *C. trachomatis* in the household environment of children with active Trachoma: A cross-sectional study in  
414 Kongwa, Tanzania. *PLoS neglected tropical diseases*. 2019;13(12):e0007834.
- 415 18. Golovaty I, Jones L, Gelaye B, Tilahun M, Belete H, Kumie A, et al. Access to water source, latrine  
416 facilities and other risk factors of active trachoma in Ankober, Ethiopia. *PLoS One*. 2009;4(8):e6702.
- 417 19. Musonda C. Association between water, sanitation and hygiene (wash) and prevalence of trachoma  
418 in Monze district of southern province, Zambia: The University of Zambia; 2020.
- 419 20. Aragie S, Wittberg DM, Tadesse W, Dagneu A, Hailu D, Chernet A, et al. Water, sanitation, and  
420 hygiene for control of trachoma in Ethiopia (WUHA): a two-arm, parallel-group, cluster-randomised trial.  
421 *The Lancet Global Health*. 2022;10(1):e87-e95.
- 422 21. Organization WH. Water sanitation & hygiene for accelerating and sustaining progress on neglected  
423 tropical diseases: a global strategy 2015-2020. World Health Organization, 2015.
- 424 22. Chikwanda M, Munyinda N, Mwale C, Mbanefo P, Banda TC, Mubita P. An association between  
425 water, sanitation, and hygiene (WASH) and prevalence of trachoma in Monze district of Southern Province,  
426 Zambia. *Journal of Water, Sanitation and Hygiene for Development*. 2021;11(3):453-60.
- 427 23. Khandekar R, Thanah TTK, Thi PD. Impact of face washing and environmental improvement on  
428 reduction of active trachoma in Vietnam—a public health intervention study. *Ophthalmic Epidemiology*.  
429 2006;13(1):43-52.
- 430 24. Ejere HO, Alhassan MB, Rabi M. Face washing promotion for preventing active trachoma.  
431 *Cochrane Database of Systematic Reviews*. 2015(2).

- 432 25. Hassali MA, Shafie AA, Saleem F, Farooqui M, Aljadhey H. A cross sectional assessment of  
433 knowledge, attitude and practice towards Hepatitis B among healthy population of Quetta, Pakistan. BMC  
434 public health. 2012;12(1):1-8.
- 435 26. AlRasheed MM, Alsugair AM, Almarzouqi HF, Alonazi GK, Aleanizy FS, Alqahtani FY, et al.  
436 Assessment of knowledge, attitude, and practice of security and safety workers toward the COVID-19  
437 pandemic: a cross-sectional Study. *Frontiers in public health*. 2021:254.
- 438 27. Stocks ME, Ogden S, Haddad D, Addiss DG, McGuire C, Freeman MC. Effect of water, sanitation,  
439 and hygiene on the prevention of trachoma: a systematic review and meta-analysis. *PLoS Med*.  
440 2014;11(2):e1001605.
- 441 28. Tadesse B, Worku A, Kumie A, Yimer SA. Effect of water, sanitation and hygiene interventions on  
442 active trachoma in North and South Wollo zones of Amhara Region, Ethiopia: A Quasi-experimental study.  
443 *PLoS neglected tropical diseases*. 2017;11(11):e0006080.
- 444 29. MuluneshG M MS, Minichil B. Trachoma prevention practice and associated factors in rural lemo  
445 district. 2021.
- 446 30. D A. Latrine Utilization and Associated Factors Among Rural Households in Dega Damot Woreda,  
447 West Gojjam Zone, Amhara Region, Ethiopia 2021.
- 448 31. T. MK. National guideline for water, sanitation and hygiene for tanzania school. july, 2016.
- 449 32. Teshale AB, Tesema GA, Tessema ZT. Spatial variations and associated factors of knowledge of  
450 ORS packet or pre-packaged liquids for the management of diarrhea among women of reproductive age in  
451 Ethiopia: A spatial and multilevel analysis. *PloS one*. 2021;16(3):e0247772.
- 452 33. Shah AR, Subramanyam MA. Community-level women's education and undernutrition among  
453 Indian adolescents: A multilevel analysis of a national survey. *PloS one*. 2021;16(5):e0251427.
- 454 34. Organization WH. WHO Alliance for the Global Elimination of Blinding Trachoma by the year  
455 2020: Progress report on elimination of trachoma, 2013. *Weekly Epidemiological Record= Relevé*  
456 *épidémiologique hebdomadaire*. 2014;89(39):421-8.
- 457 35. Khandekar R, Bullard M, Thanh TTK, Binh TQ. Knowledge and practice related to trachoma  
458 among children in Vietnam: A cross-sectional study. *Journal of health communication*. 2004;9(1):77-83.

- 459 36. david.K. Water Supply and Sanitation in Vietnam. 2 JMP-UNICEF special tabulation per  
 460 wealth quintile, using MICS 2013.
- 461 37. Kuper H, Solomon AW, Buchan J, Zondervan M, Foster A, Mabey D. A critical review of the  
 462 SAFE strategy for the prevention of blinding trachoma. *The Lancet Infectious diseases*. 2003;3(6):372-81.
- 463 38. Asaolu SO, Ofoezie IE. The role of health education and sanitation in the control of helminth  
 464 infections. *Acta tropica*. 2003;86(2-3):283-94.
- 465 39. PN. M. . Knowledge, Practices and Perceptions of Trachoma and its' Influence (Association  
 466 With) on Health Seeking Behaviour of Patients in Kajiado Central Sub County, Kajiado County, Kenya:  
 467 COHES, JKUAT; . 2017.

468

## 469 **Tables**

470 Table 1:-socio demographic characteristics of mothers having children aged under nine  
 471 years in Andabet, north west Ethiopia, 2022 :a multi-level analysis (n=624)

| Variables             | Category              | Frequency | Percentage |
|-----------------------|-----------------------|-----------|------------|
| Mother age (in years) | 15-24                 | 88        | 14.10      |
|                       | 25-34                 | 312       | 50.00      |
|                       | 35yrs and above       | 224       | 35.90      |
| Residence             | Rural                 | 450       | 72.12      |
|                       | Urban                 | 174       | 27.88      |
| Religion              | Orthodox              | 575       | 92.15      |
|                       | Muslim                | 49        | 7.85       |
| Marital status        | Married               | 463       | 74.2       |
|                       | Not currently married | 161       | 25.8       |
| Mother                | Primary               | 158       | 25.32      |
|                       | Secondary & above     | 109       | 17.47      |

|                             |                     |     |       |
|-----------------------------|---------------------|-----|-------|
| Father                      | Primary             | 117 | 25.27 |
|                             | Secondary & above   | 113 | 24.41 |
| Occupation of               | Farmer              | 297 | 47.60 |
| Mothers                     | Housewife           | 174 | 27.88 |
|                             | Government          | 37  | 5.93  |
| Child age                   | Merchant            | 79  | 12.66 |
|                             | Daily laborer       | 37  | 5.93  |
|                             | Above 2 yrs.        | 128 | 20.51 |
|                             | 2yrs and under 2yrs | 496 | 79.49 |
| Sex of the child            | Male                | 321 | 51.44 |
|                             | Female              | 303 | 48.56 |
| education about<br>Trachoma | Yes                 | 70  | 11.22 |
|                             | No                  | 554 | 88.78 |
| illiteracy level            | High                | 243 | 38.94 |
|                             | Low                 | 381 | 61.06 |

472

473

474 Table 2:-Environmental and other related characteristics of mothers having children  
475 aged under nine years in Andabet district, north west Ethiopia,2022 :a multi-level  
476 analysis (n=624)

| Variables       | Category      | Frequency | Percent |
|-----------------|---------------|-----------|---------|
| Source of water | River         | 457       | 73.24   |
|                 | Household tap | 167       | 26.76   |



|                              |                       |     |       |
|------------------------------|-----------------------|-----|-------|
| Time taken to water          | <=30 min              | 282 | 45.19 |
| Point                        | >30 min               | 342 | 54.81 |
| Amount of water used         | <=20 liter            | 128 | 20.51 |
| per person per day           | >20 liter             | 496 | 79.49 |
| Frequency of getting         | All the time          | 516 | 82.69 |
| water                        | Either day or night   | 17  | 2.72  |
|                              | In more than a day    | 91  | 14.59 |
| Source of Energy for cooking |                       |     |       |
| Electricity                  | Yes                   | 12  | 1.92  |
|                              | No                    | 612 | 98.08 |
| Wood                         | Yes                   | 615 | 98.56 |
|                              | No                    | 9   | 1.44  |
| Animal dung                  | Yes                   | 610 | 97.76 |
|                              | No                    | 14  | 2.24  |
| Charcoal                     | Yes                   | 278 | 44.62 |
|                              | No                    | 345 | 55.38 |
| Type of household            | Covered pit latrine   | 414 | 84.49 |
| latrine used                 | Uncovered pit latrine | 76  | 15.51 |

|                                                       |           |     |       |
|-------------------------------------------------------|-----------|-----|-------|
| Cleanness of latrine                                  | Clean     | 327 | 67.01 |
|                                                       | Not clean | 161 | 32.99 |
| Availability of hand washing material near to latrine | Yes       | 15  | 3.07  |
|                                                       | No        | 473 | 96.93 |
| Cleanness of the home compound                        | Clean     | 176 | 28.21 |
|                                                       | Not clean | 448 | 71.79 |
| availability of community latrine                     | Yes       | 153 | 24.52 |
|                                                       | No        | 471 | 75.48 |
| Basic trachoma knowledge                              | Good      | 219 | 35.1  |
|                                                       | Poor      | 405 | 64.9  |
| Attitude towards trachoma                             | Good      | 354 | 56.73 |
|                                                       | poor      | 270 | 43.27 |

---

477

478

479

480 Table 3:-Trachoma prevention practice and associated factors among mothers having  
481 children aged under nine years in Andabet district, north west Ethiopia ,2022:a multi-level  
482 analysis (n=624)

| Variables                           | Frequency | Percentage |
|-------------------------------------|-----------|------------|
| Mother facial cleanness             | 427       | 68.43      |
| Clean                               |           |            |
| Not clean                           | 197       | 31.57      |
| Child facial cleanness              |           |            |
| Clean                               | 167       | 26.76      |
| Not clean                           | 457       | 73.24      |
| Using soap for face washing         |           |            |
| Yes                                 | 491       | 78.69      |
| No                                  | 133       | 21.31      |
| Did not share fomites with family   |           |            |
| Yes                                 | 460       | 73.72      |
| No                                  | 164       | 26.28      |
| Separated house for animal dwelling |           |            |
| Yes                                 | 296       | 47.44      |
| No                                  | 328       | 52.56      |
| Availability of household latrine   |           |            |

|                                    |     |       |
|------------------------------------|-----|-------|
| Yes                                | 488 | 78.21 |
| NO                                 | 136 | 21.79 |
| Infant feces disposal to latrine   |     |       |
| Yes                                | 482 | 77.24 |
| No                                 | 142 | 22.76 |
| Utilization of latrine             |     |       |
| Yes                                | 483 | 77.4  |
| No                                 | 141 | 22.6  |
| Availability of waste disposal pit |     |       |
| Yes                                | 289 | 46.39 |
| No                                 | 334 | 53.61 |
| Utilization of waste disposal pit  |     |       |
| Yes                                | 293 | 46.96 |
| No                                 | 331 | 53.04 |

484

485 Table 4:-random effect in trachoma prevention practice among mothers having children  
 486 aged under nine years in Andabet, North west Ethiopia,2022:a multi-level analysis  
 487 (n=624)

| Parameter | Model 1 | Model 2 | Model 3 | Model 4 |
|-----------|---------|---------|---------|---------|
| MOR       | 6.51    | 2.90    | 3.77    | 2.67    |
| PCV       | Reff.   | 0.678   | 0.497   | 0.706   |
| ICC       | 0.54    | 0.27    | 0.37    | 0.25    |
| Deviance  | 583.69  | 536.13  | 576.34  | 531.74  |

488

489 Table 5:-Multilevel logistic regression analysis factors associated with trachoma  
 490 prevention practice among mothers having children aged under nine years in Andabet  
 491 district, North west Ethiopia,2022:a multi-level analysis (n=624)

| Variables                  | Model 1 | Mode 2<br>AOR 95%(CI) | Mode 3<br>AOR 95%(CI) | Mode 4<br>AOR 95%(CI) |
|----------------------------|---------|-----------------------|-----------------------|-----------------------|
| <b>Mother education</b>    |         |                       |                       |                       |
| No formal education        |         | 2.97(1.42,6.19)       |                       | 2.95(1.41,6.15)**     |
| Primary                    |         | 2.36 (1.05, 5.32)     |                       | 2.33(1.04,5.24)*      |
| Secondary & above          |         | 1.00                  |                       | 1.00                  |
| <b>Maternal occupation</b> |         |                       |                       |                       |
| Housewife                  |         | 1.00                  |                       | 1.00                  |
| Farmer                     |         | 3.16(1.82,5.50)       |                       | 3.02(1.73,5.28) ***   |
| Government employee        |         | 1.40(0.45,4.35)       |                       | 1.39(0.44,4.37)       |
| Merchant                   |         |                       |                       |                       |

|                                    |                  |                   |
|------------------------------------|------------------|-------------------|
|                                    | 2.64(1.21,5.75)  | 2.63(1.20,5.75) * |
| Daily laborer                      |                  | 1.61(0.60,4.36)   |
|                                    | 1.64(0.61,4.41)  |                   |
| Frequency of<br>getting water      |                  |                   |
| All the time                       | 1.00             | 1.00              |
| Day or night                       | 0.45(0.10,2.32)  | 0.51(0.10,2.50)   |
| In > a day                         | 0.48(0.2,1.13)   | 0.50(0.21,1.19)   |
| Time taken to water<br>point       |                  |                   |
| ≤30 minute                         | 1.00             | 1.00              |
| > 30 minutes                       | 5.85(1.70,20.10) | 4.60(1.30,16.26)* |
| Taking education<br>about trachoma |                  |                   |
| No                                 | 2.25(1.11,4.57)  | 2.36(1.16,4.79)*  |
| Yes                                | 1.00             | 1.00              |

Source of water

River 0.45(0.07,3.15) 0.54(0.07,4.26)

Household tap

1.00 1.00

Residence

Rural 3.53(0.53,23.54) 3.16(0.42,23.70)

Urban 1.00 1.00

Community women

illiteracy 0.09(0.01,0.87) 0.46(0.1,3.55)

Low

High 1.00 1.00

492

493 note: \*\*\* =P<0.001, \*\* P<0.01, and \* = P<0.05

494

495

496

497

498

499

500

501

502 **Figures**

503

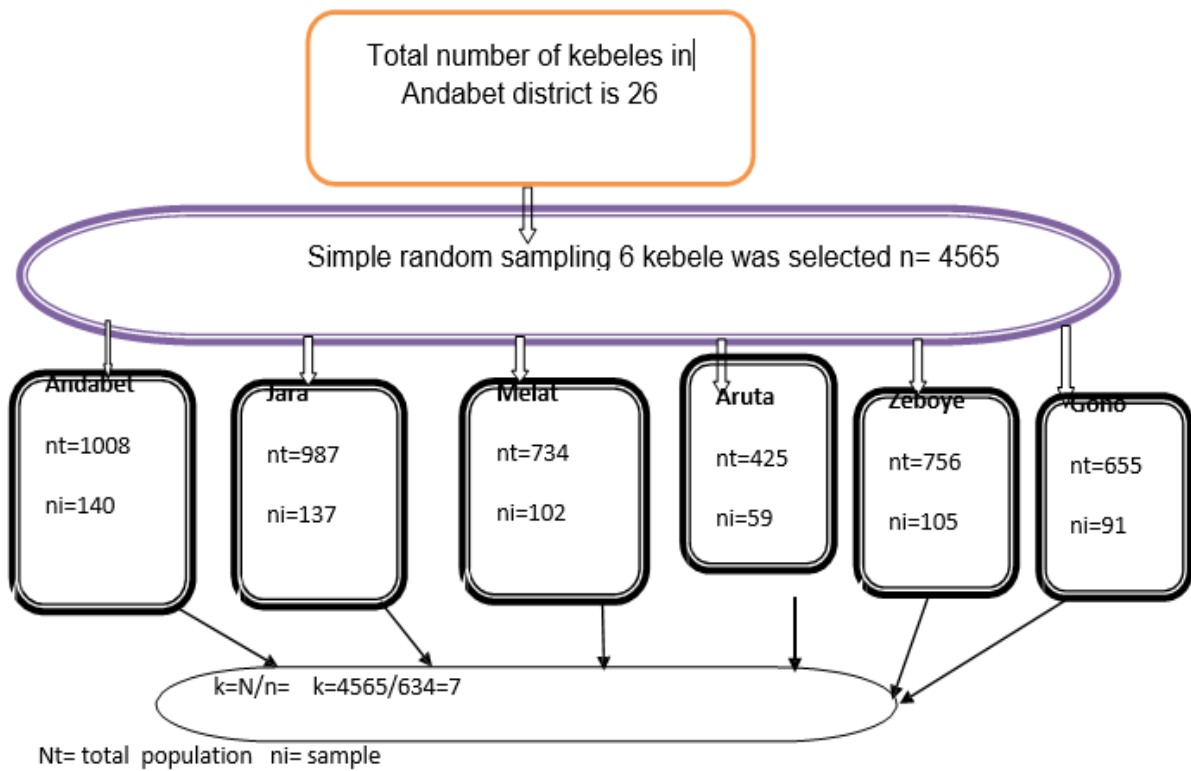

504

505 Figure 1:-schematic presentation of sampling technique of trachoma prevention practice

506 among mothers having children aged under nine years in Andabet district, North west

507 Ethiopia,2022:a multi-level analysis



508

509

510

511

512

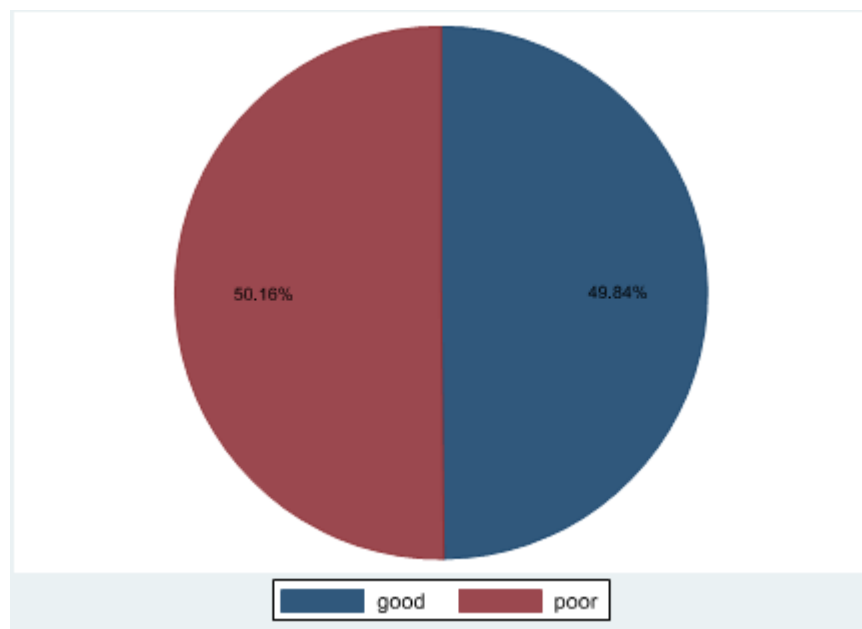

513

514

515 Figure 2: Trachoma prevention practice among mothers having children aged  
516 under nine years in Andabet district, North west Ethiopia,2022 :a multi-level  
517 analysis (n=624)

518

519

520

521

522

523

524
